# Supplementary material
Source: PubMed Central journal article supplement (PMC6233331)

## Supporting Figures

On all figures, for all lobes, from left to right, the resolutions are: 83, 129, 234, 463 and 1015 vertices.

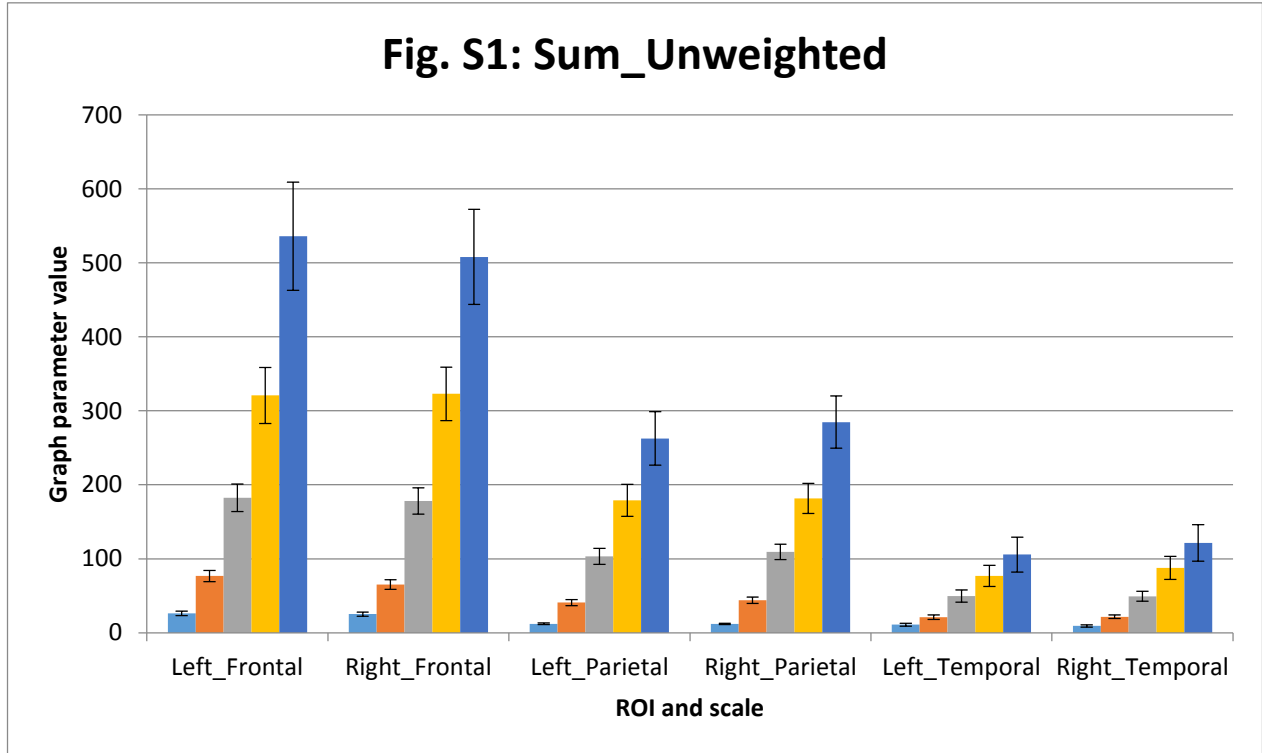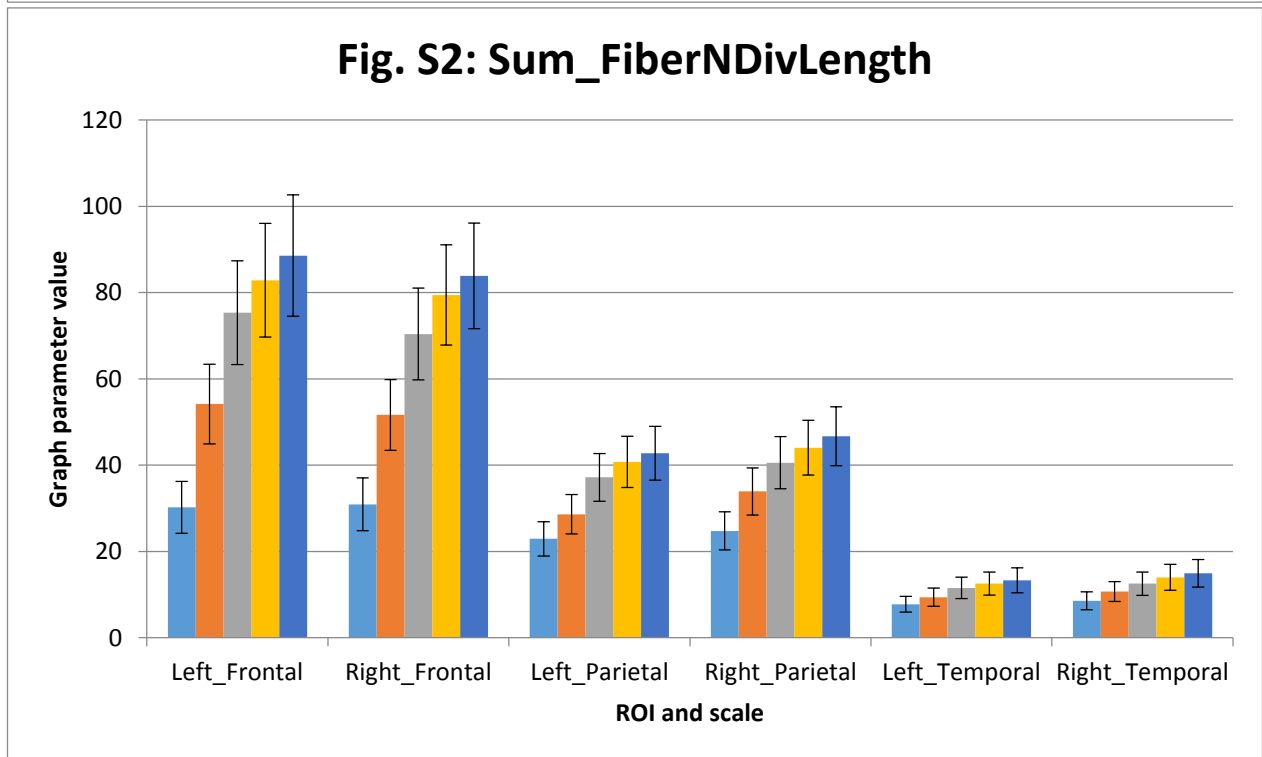

**Fig. S3: Sum\_FiberN**

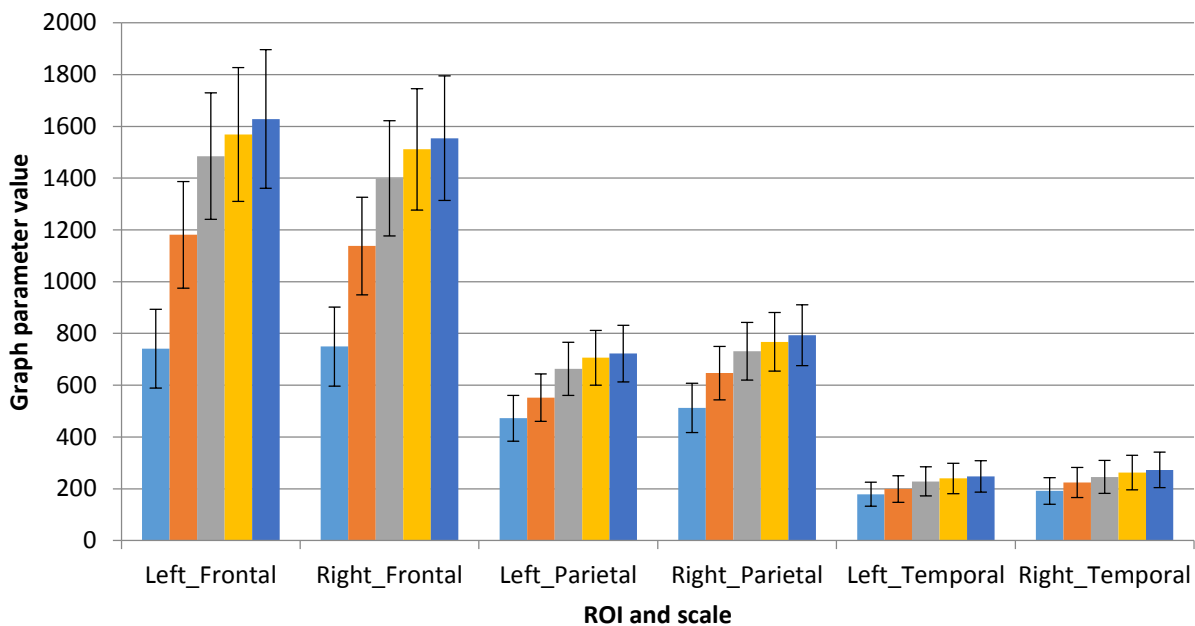

**Fig. S4: Sum\_FiberLengthMean**

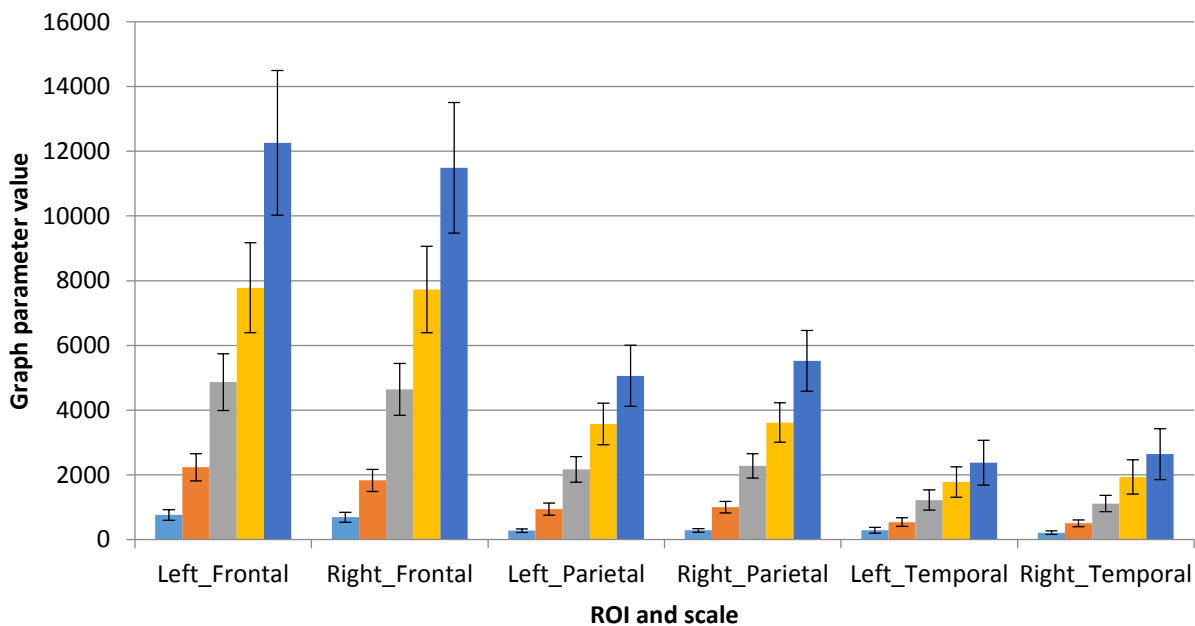

**Fig. S5: Sum\_FAMean**

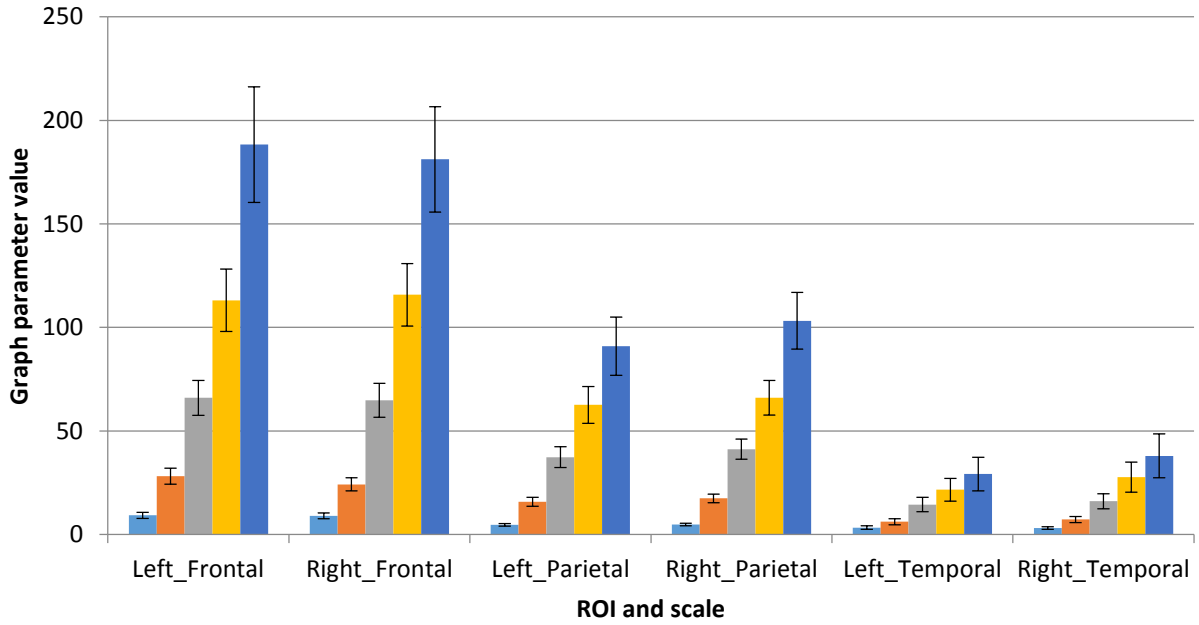

**Fig. S6: AvgDegree\_Unweighted**

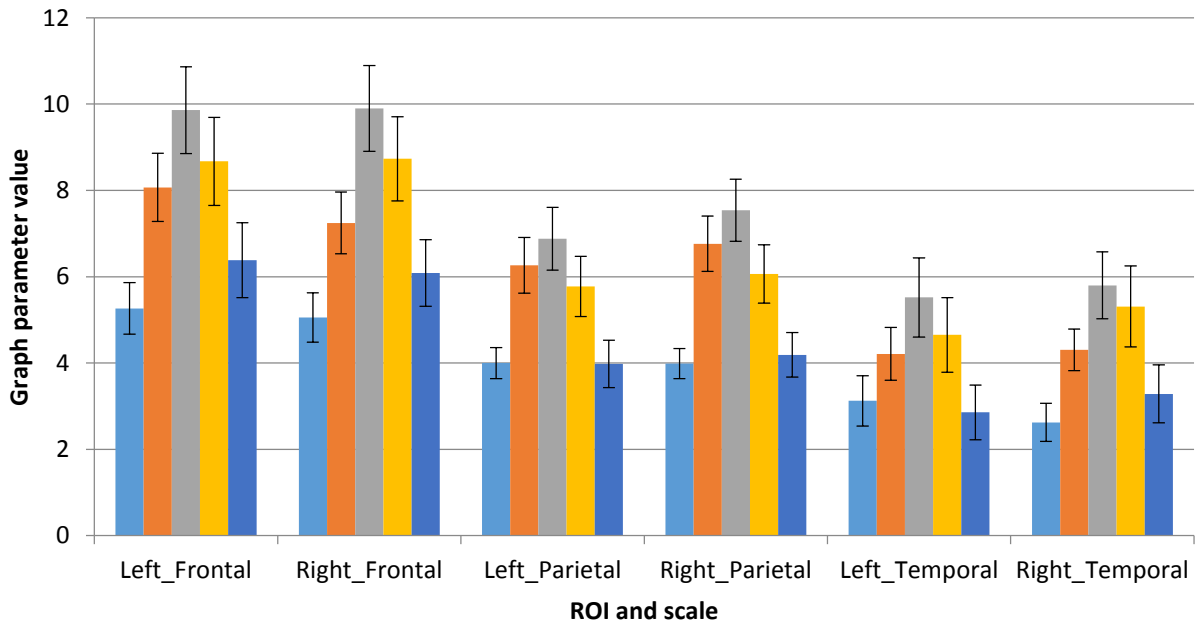

**Fig. S7: AvgDegree\_FiberNDivLength**

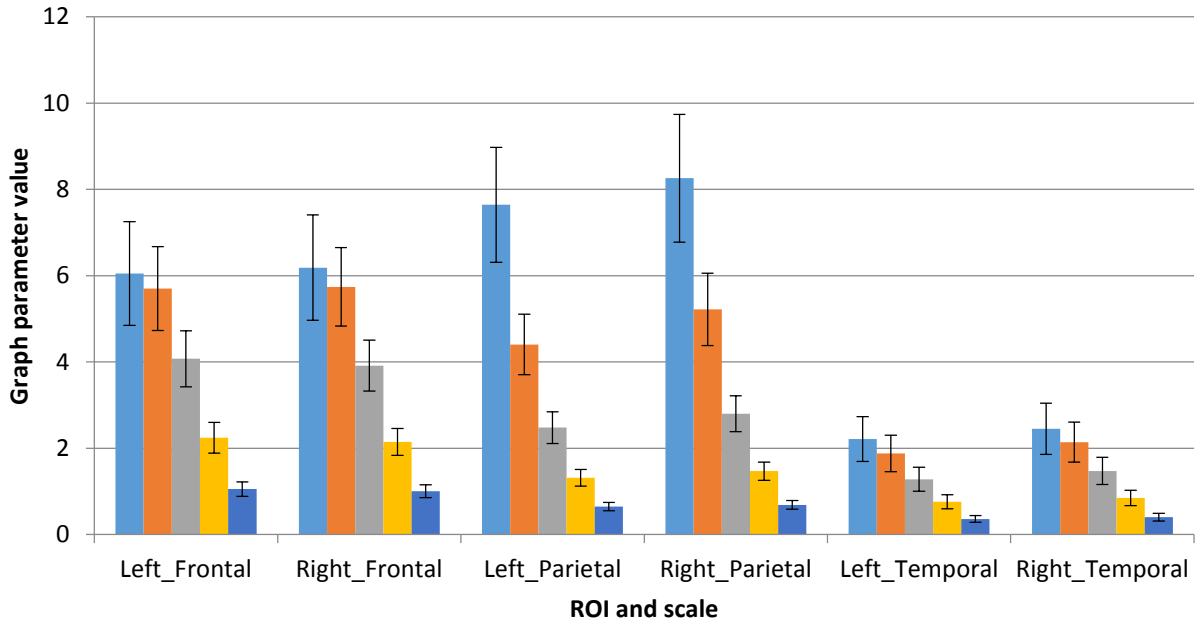

**Fig. S8: AvgDegree\_FiberN**

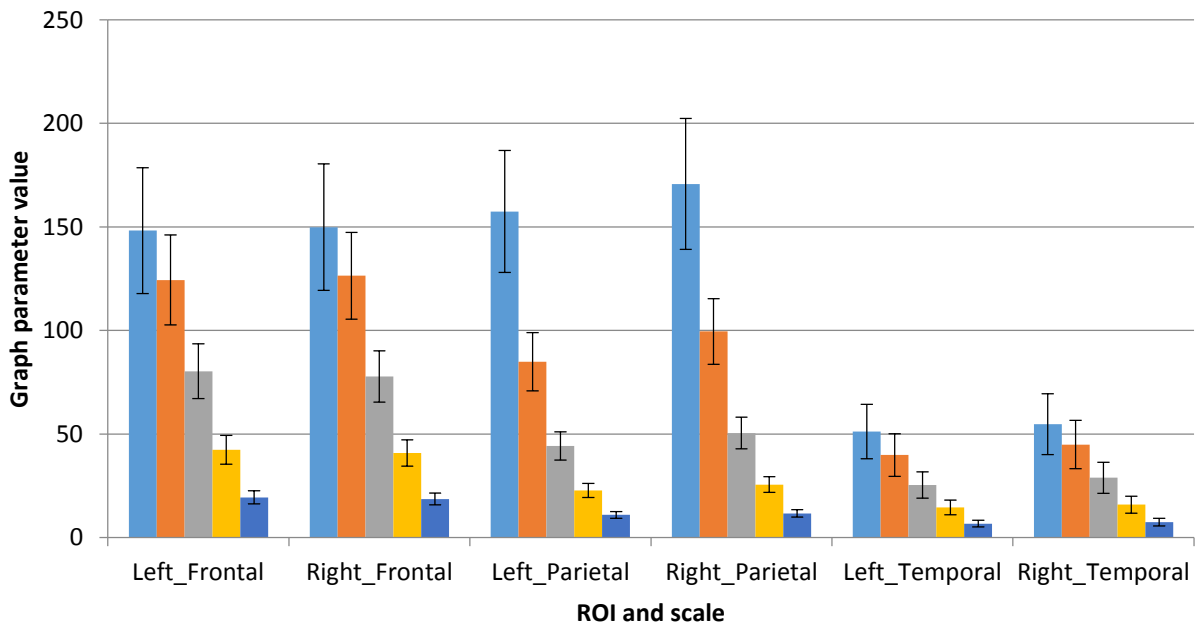

**Fig. S9: AvgDegree\_FiberLengthMean**

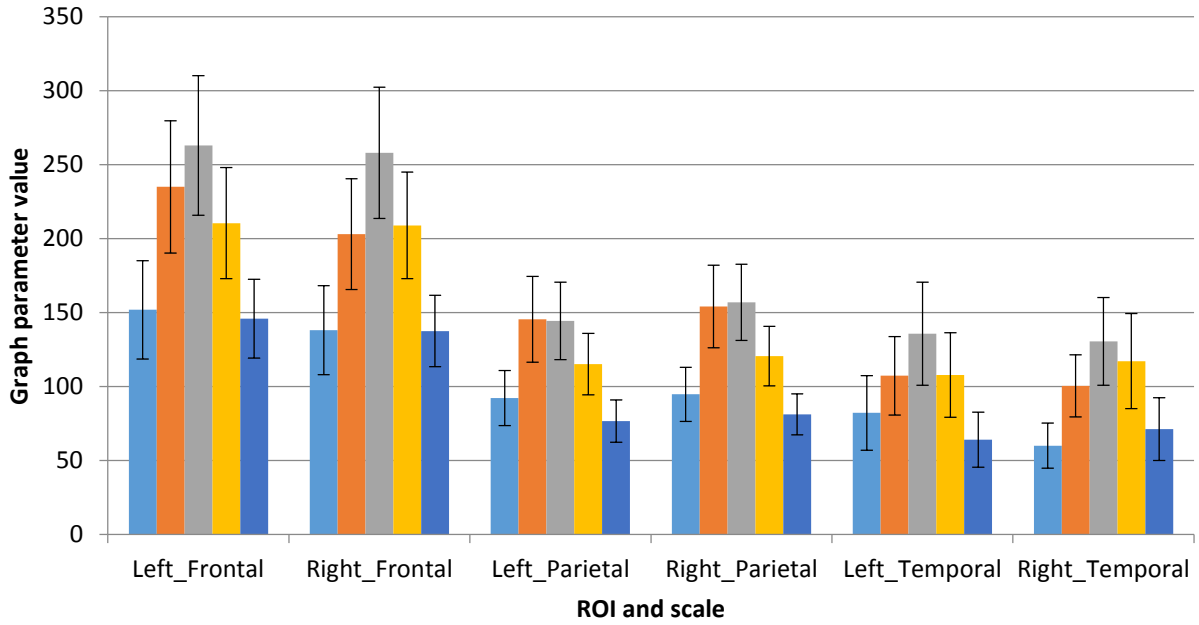

**Fig. S10: AvgDegree\_FAMean**

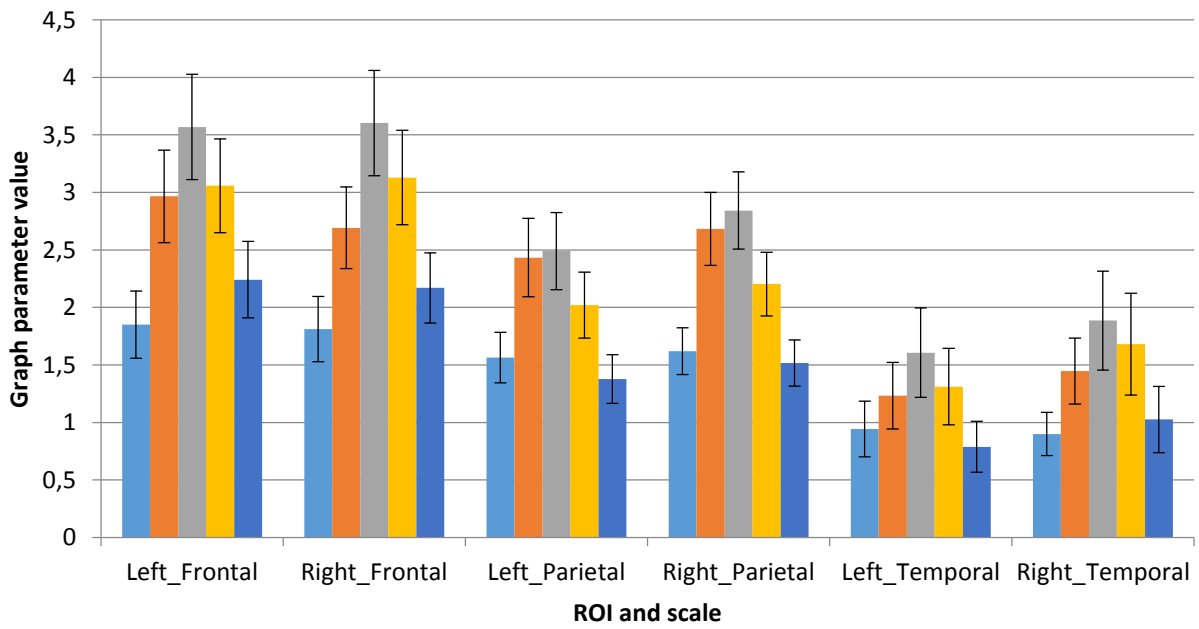

**Fig. S11: Density\_Unweighted**

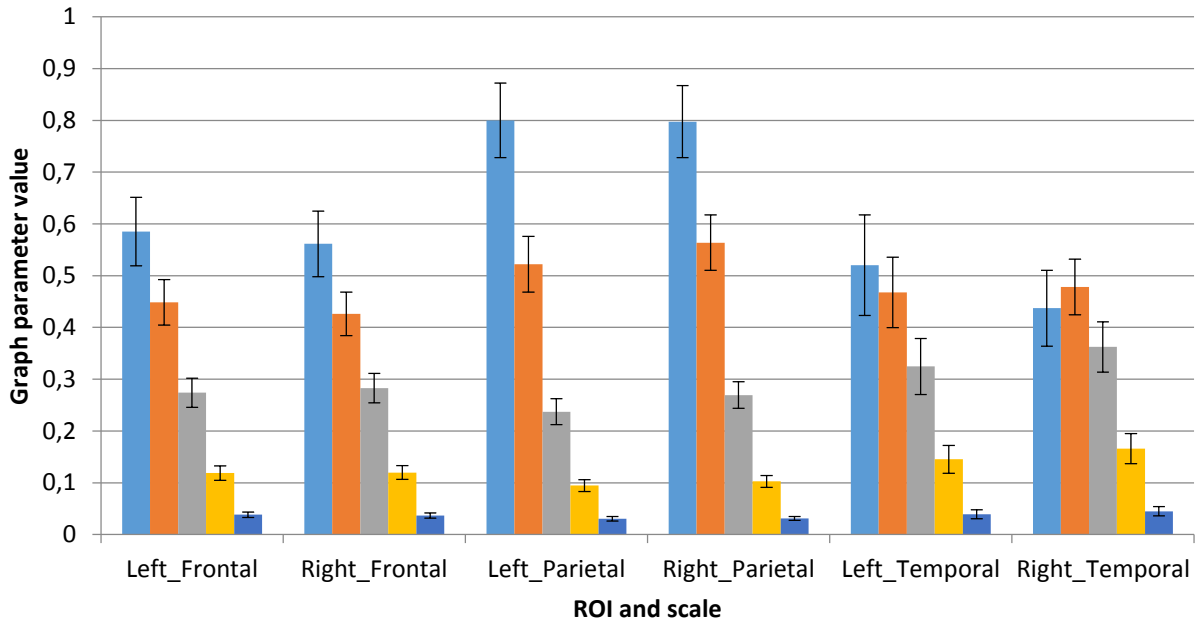

**Fig. S12: Density\_FiberNDivLength**

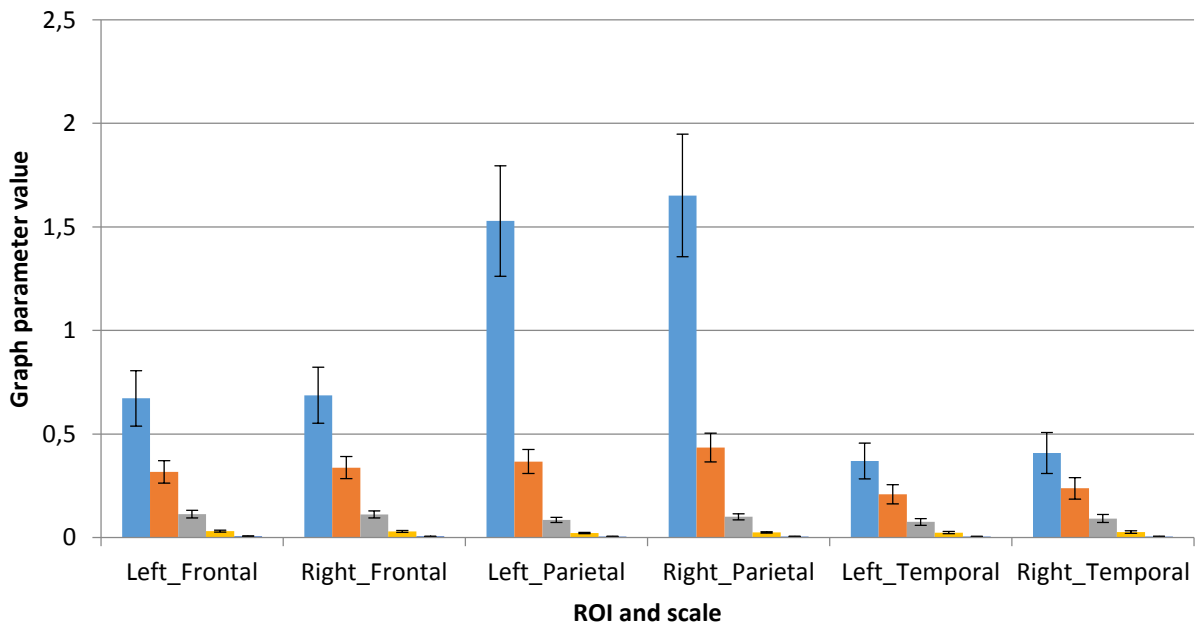

**Fig. S13: Density\_FiberN**

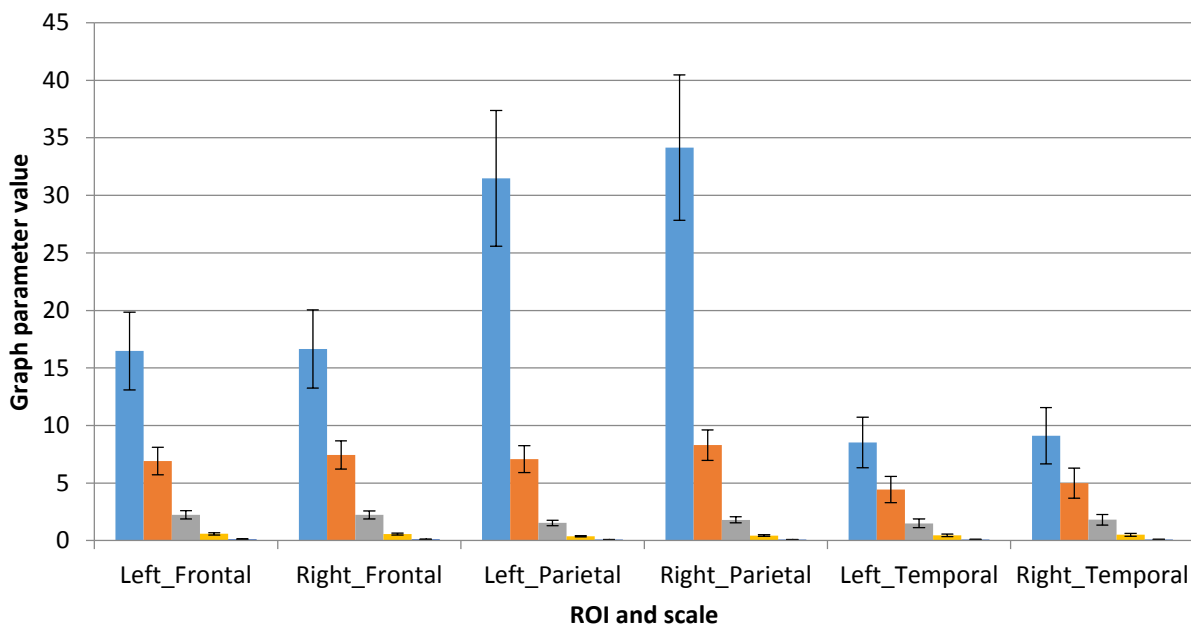

**Fig. S14: Density\_FiberLengthMean**

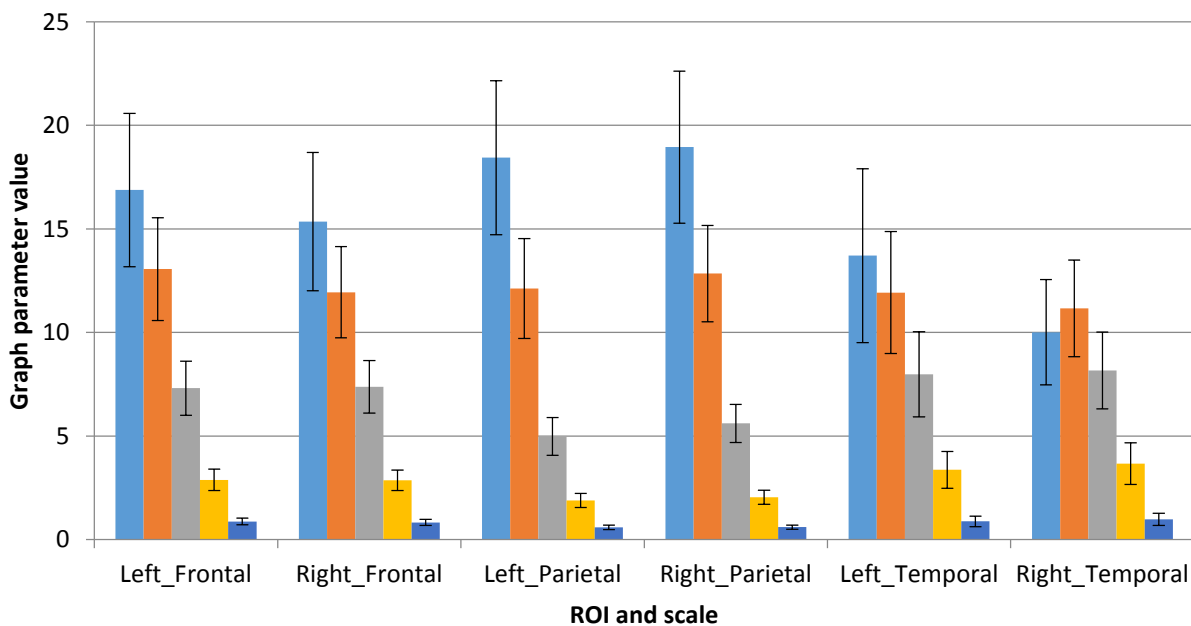

**Fig. S15: Density\_FAMean**

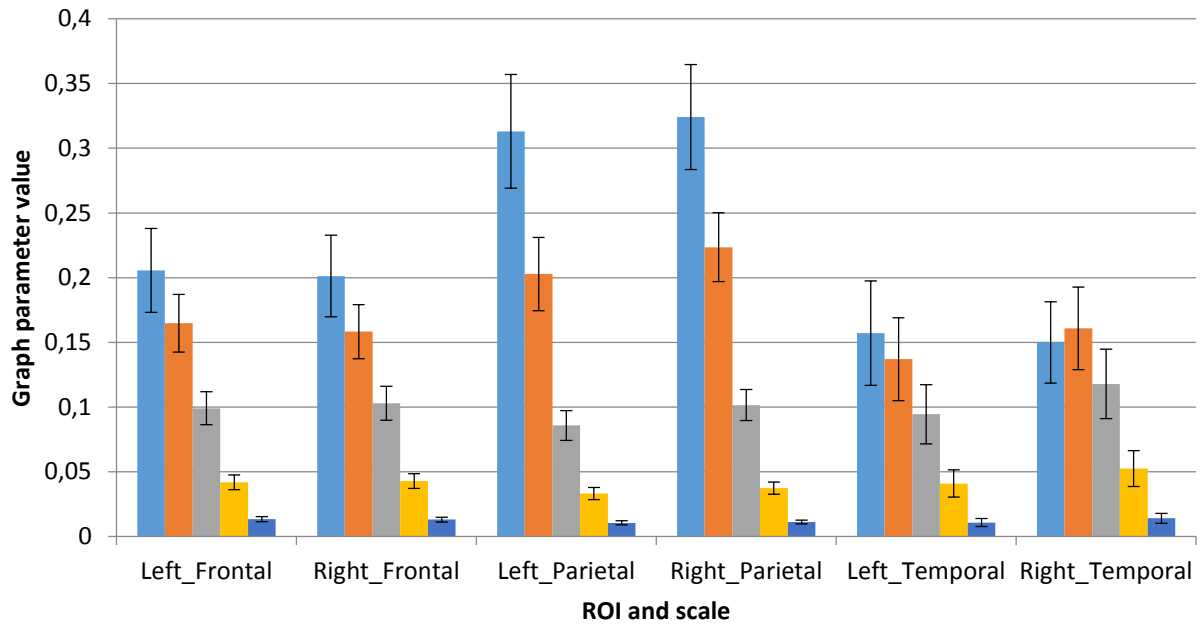

**Fig. S16: MinVertexCover\_Unweighted**

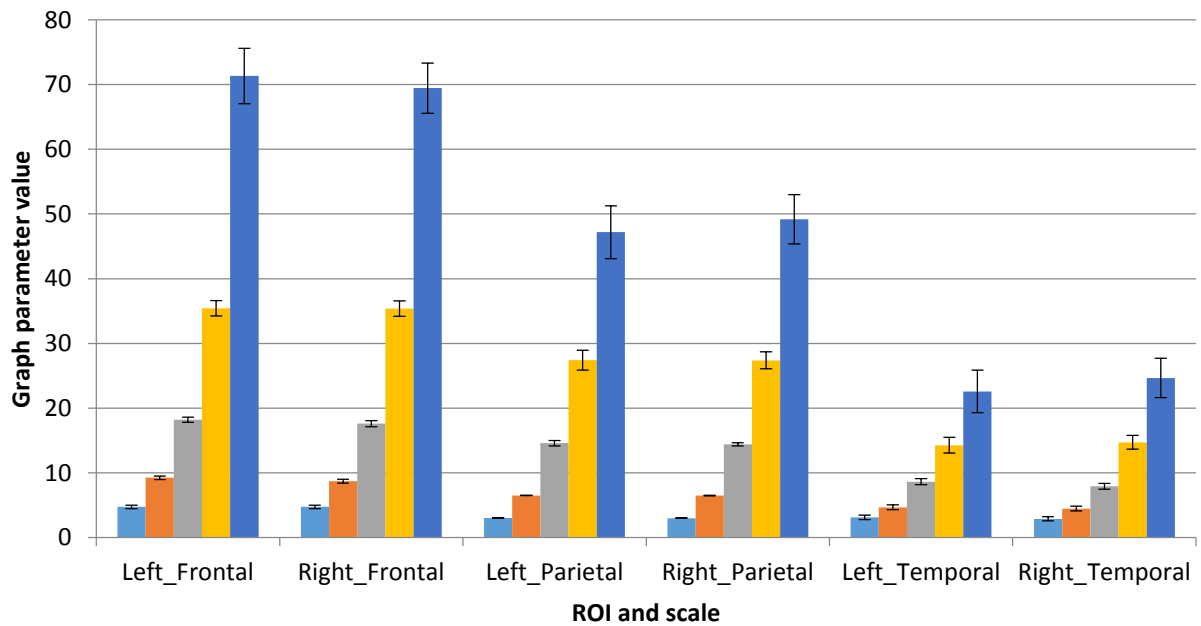



**Fig. S17: MinVertexCover\_FiberNDivLength**

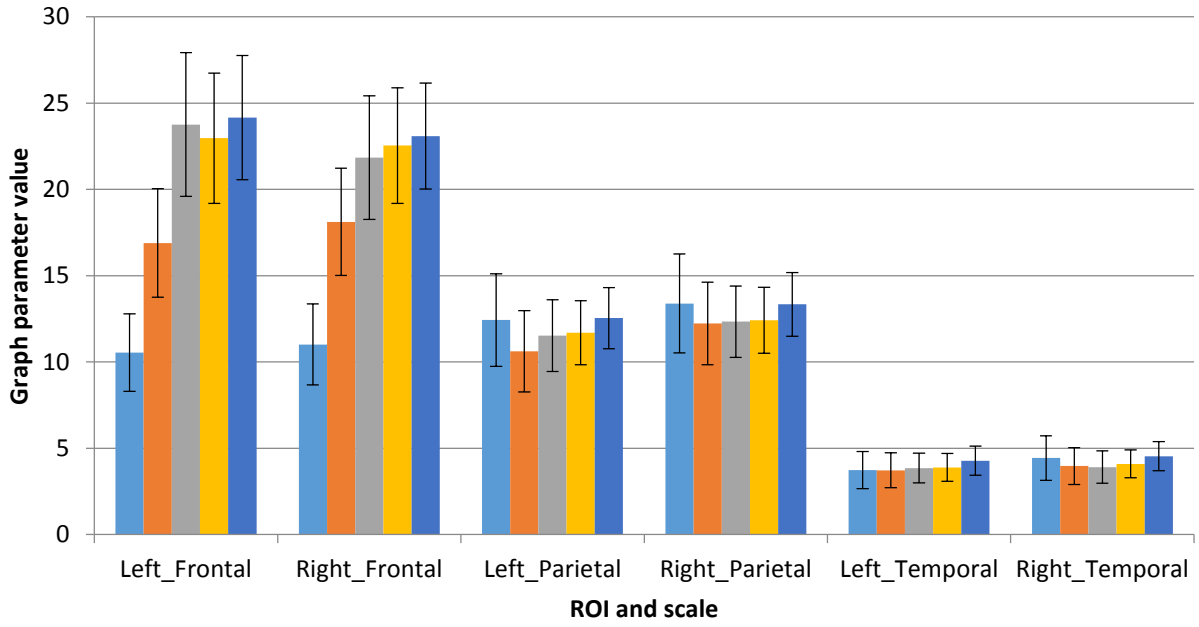

**Fig. S18: MinVertexCover\_FiberN**

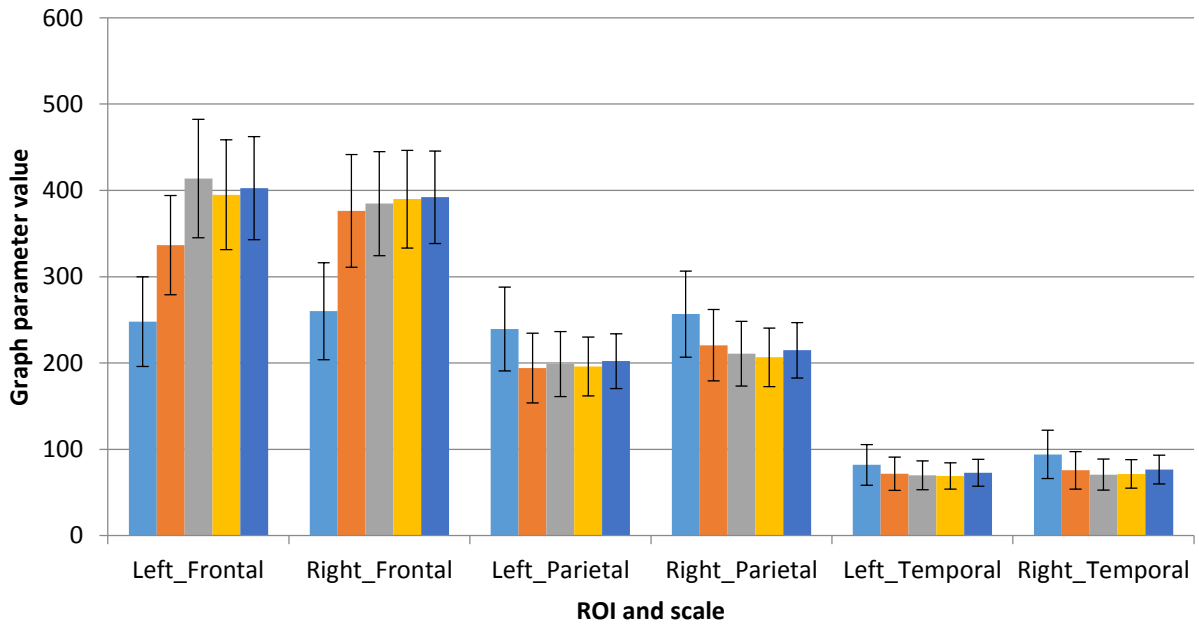

**Fig. S19: MinVertexCover\_FiberLengthMean**

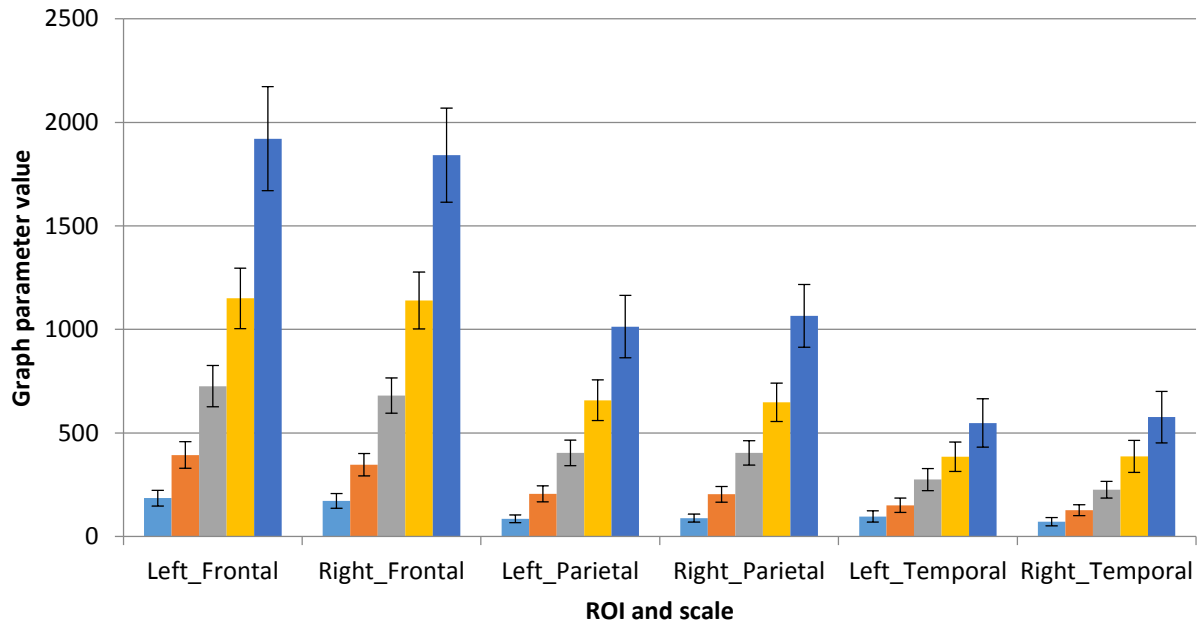

**Fig. S20: MinVertexCover\_FAMean**

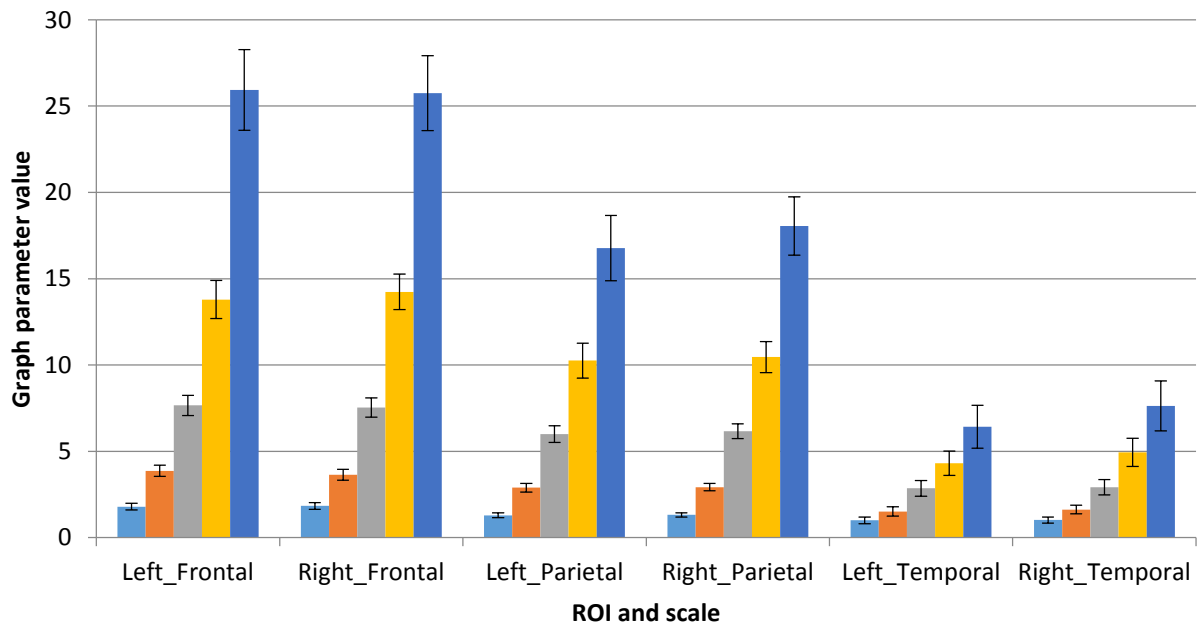

**Fig. S21: MinVertexCoverDivN\_Unweighted**

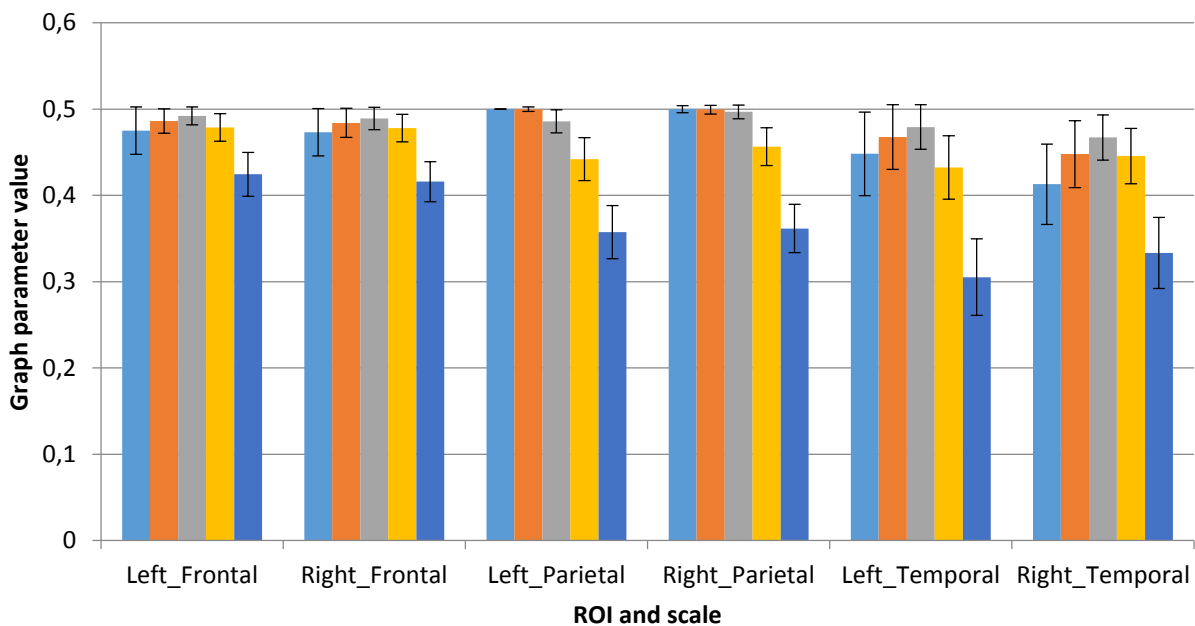

**Fig. S22: MinVertexCoverDivN\_FiberNDivLength**

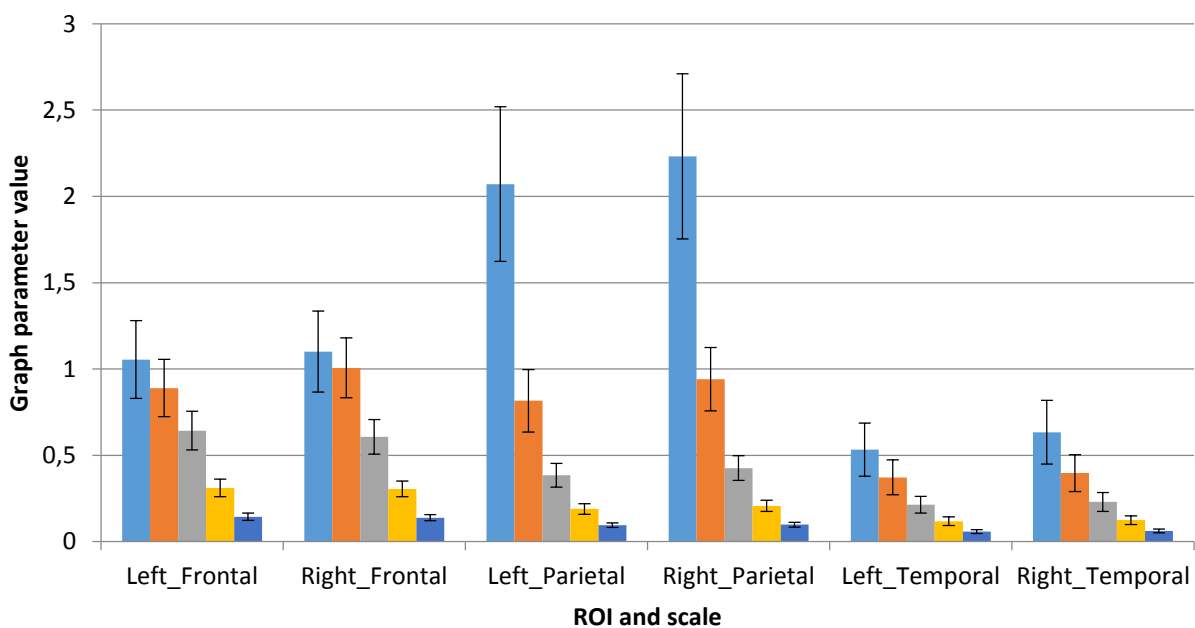

**Fig. S23: MinVertexCoverDivN\_FiberN**

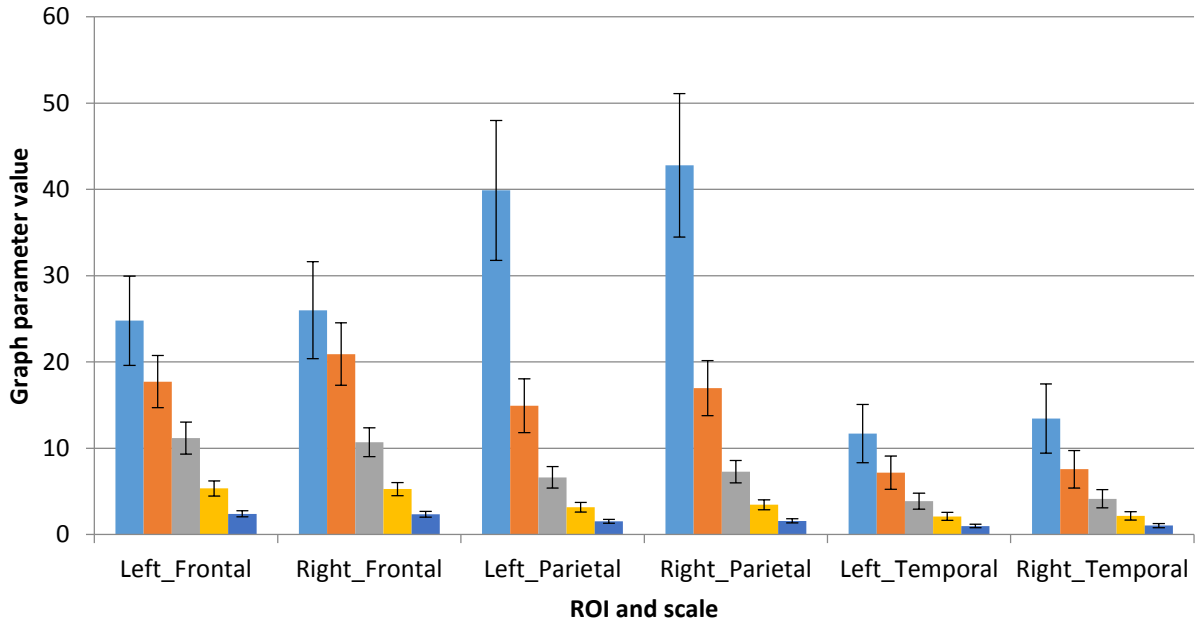

**Fig. S24: MinVertexCoverDivN\_FiberLengthMean**

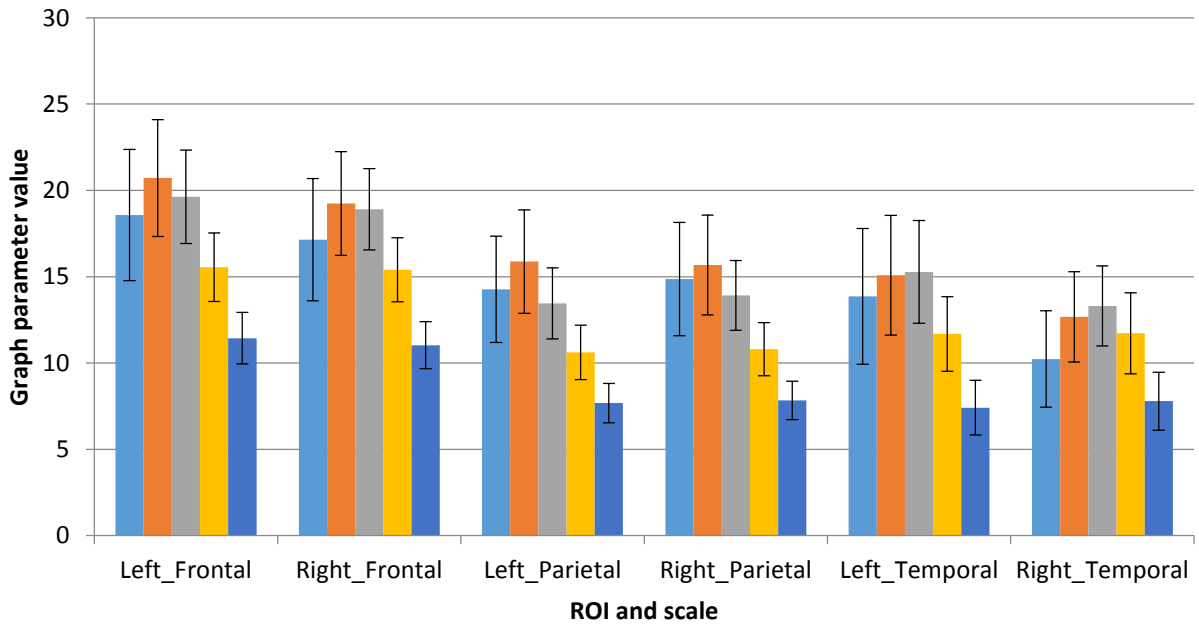

**Fig. S25: MinVertexCoverDivN\_FAMean**

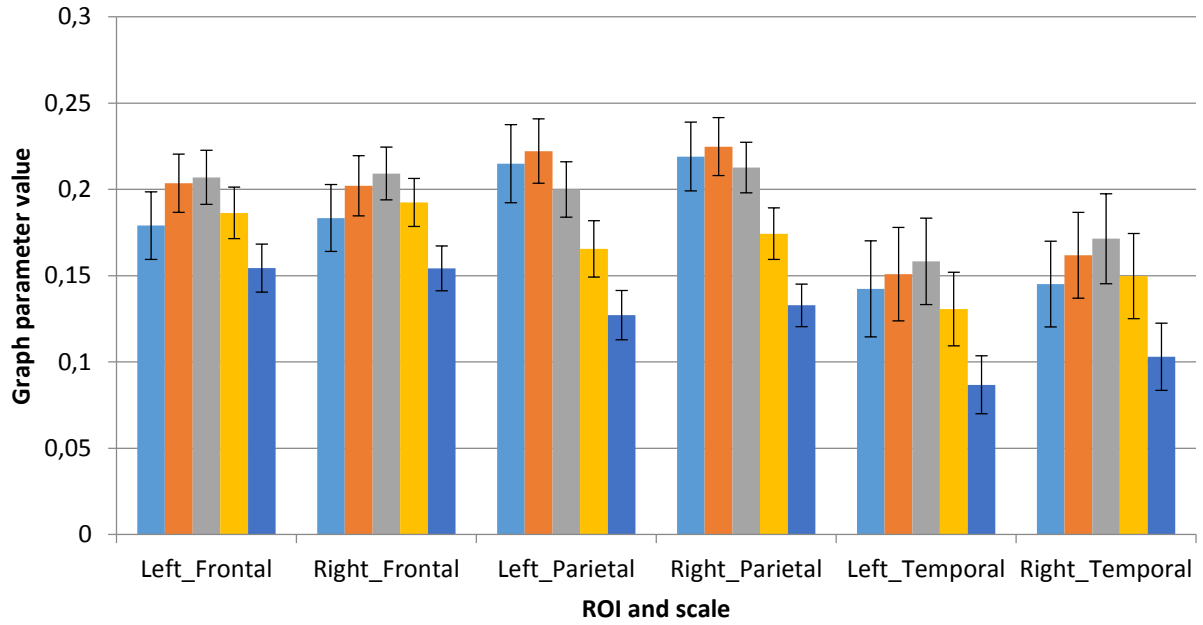

**Fig. S26: PGEigengap\_Unweighted**

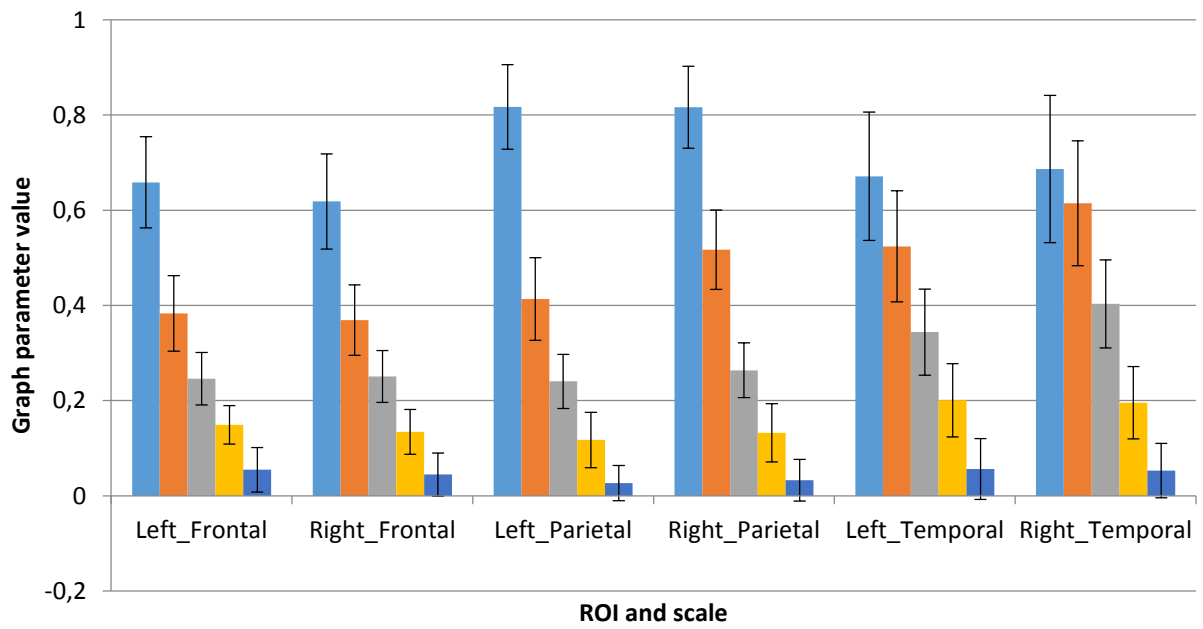

**Fig. S27: PGEigengap\_FiberNDivLength**

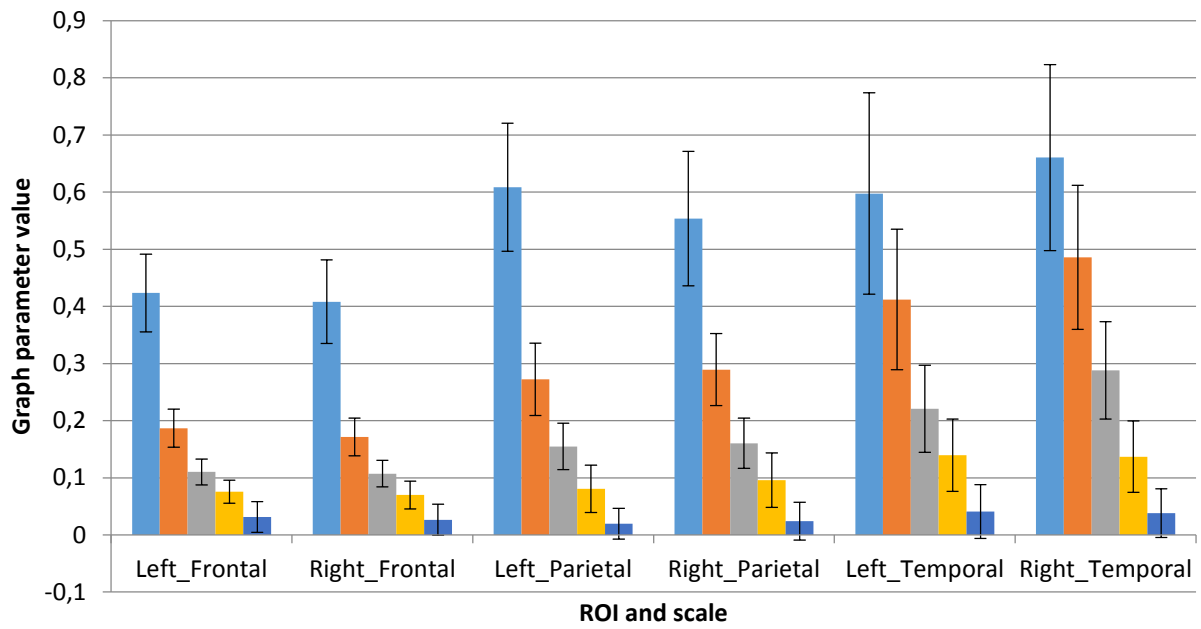

**Fig. S28: PGEigengap\_FiberN**

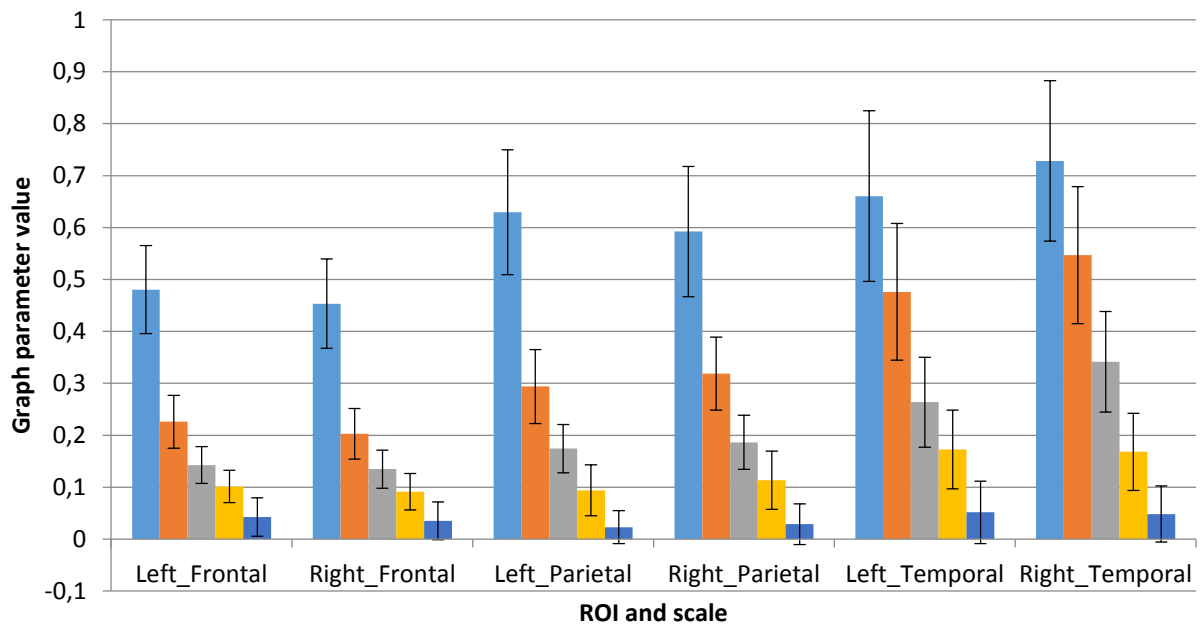

**Fig. S29: PGEigengap\_FiberLengthMean**

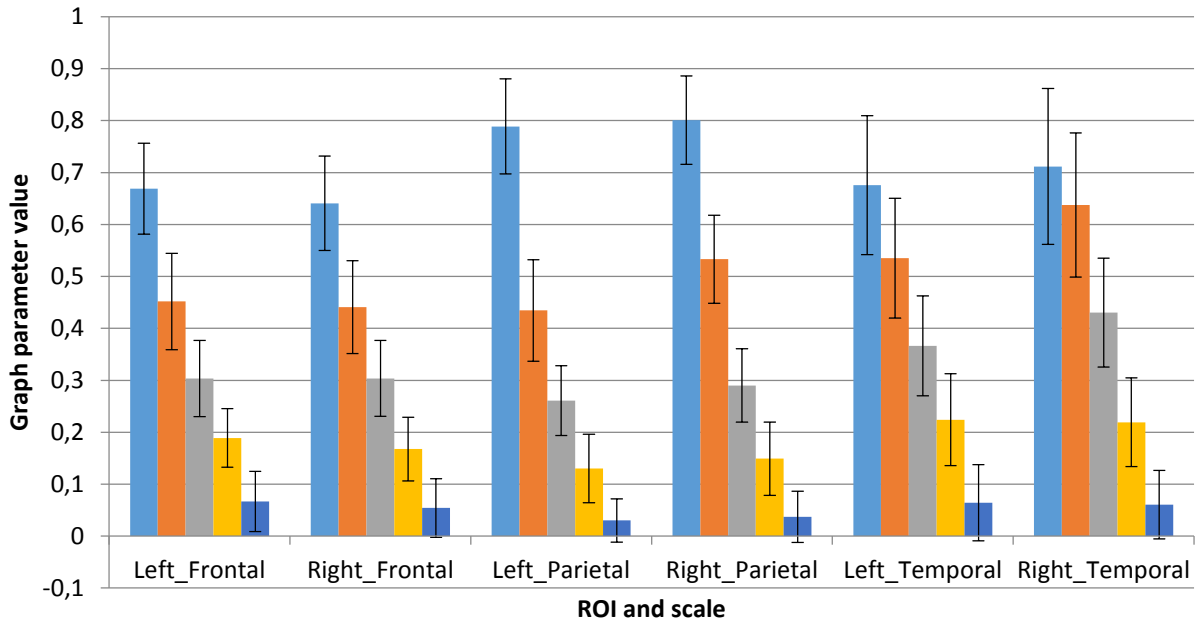

**Fig. S30: PGEigengap\_FAMean**

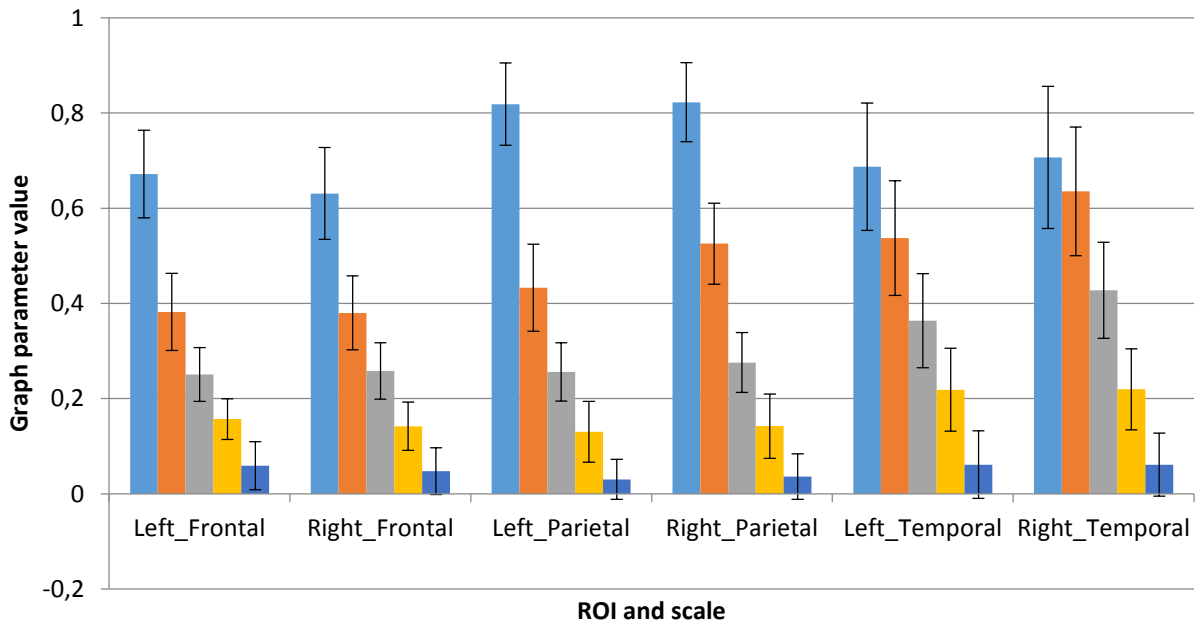

**Fig. S31: AdjLMaxDivD\_Unweighted**

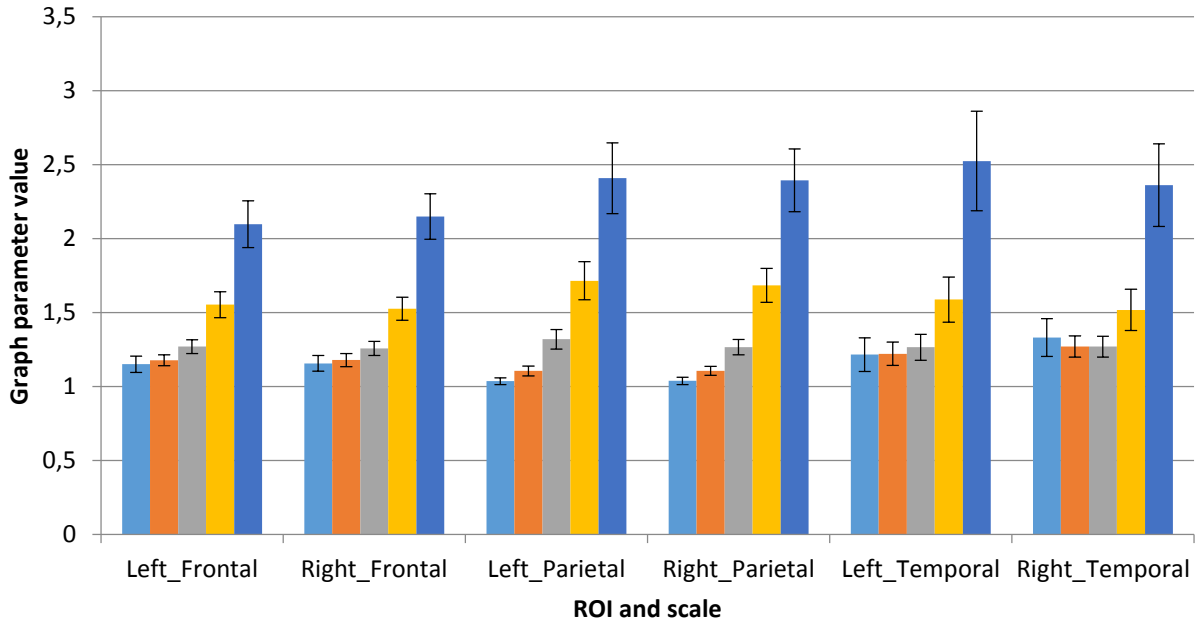

**Fig. S32: AdjLMaxDivD\_FiberNDivLength**

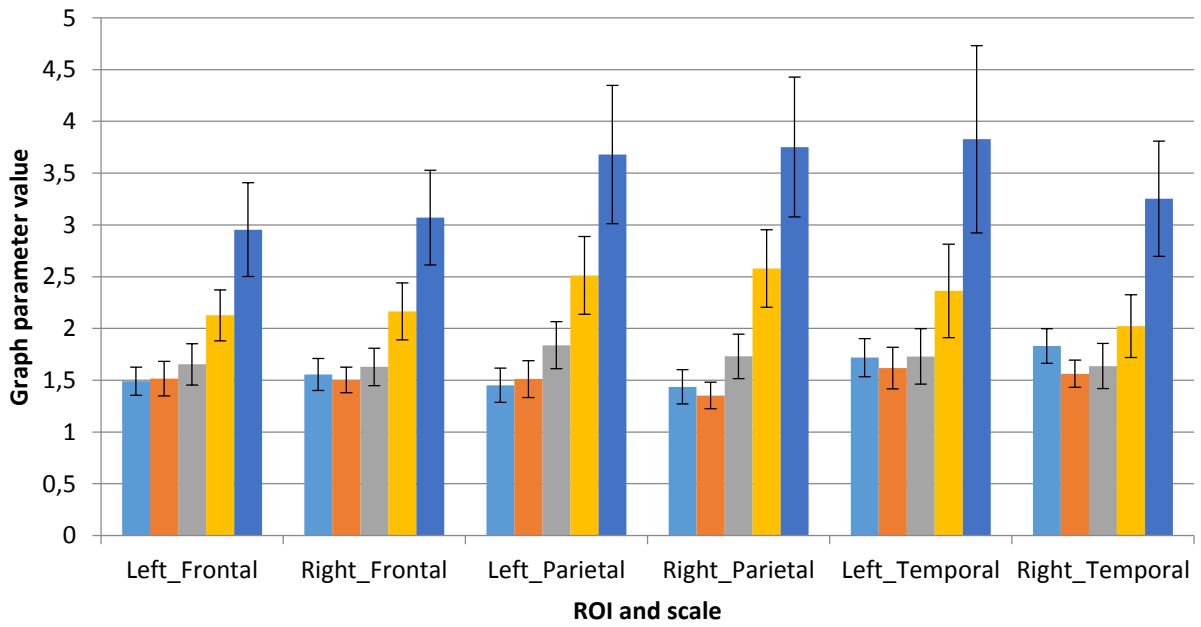



**Fig. S33: AdjLMaxDivD\_FiberN**

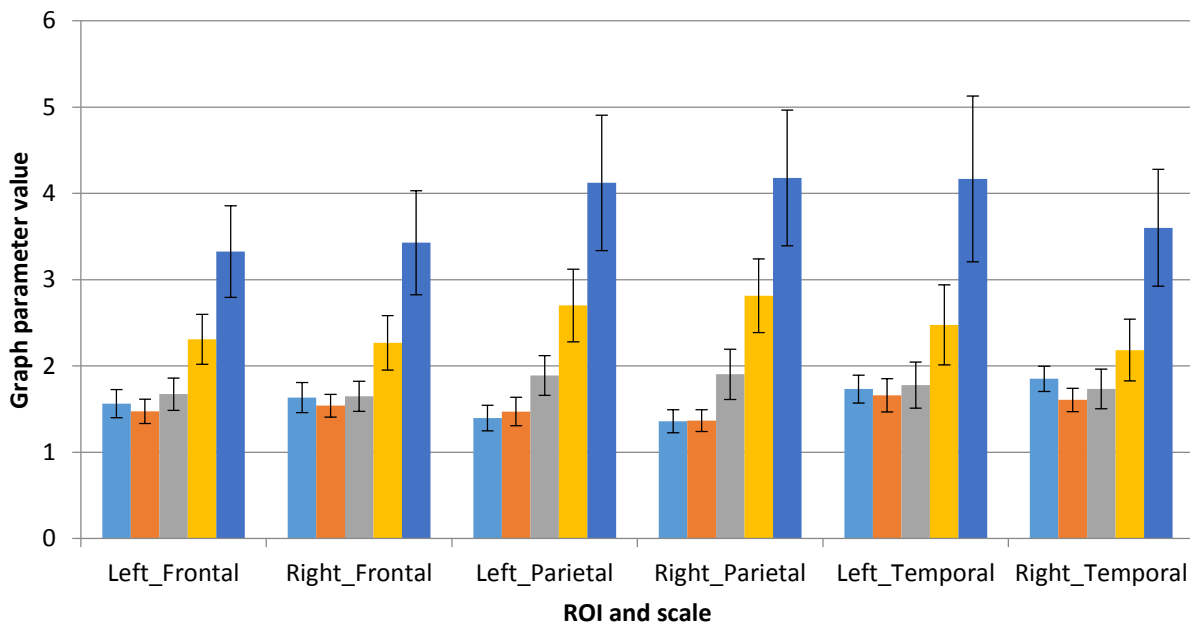

**Fig. S34: AdjLMaxDivD\_FiberLengthMean**

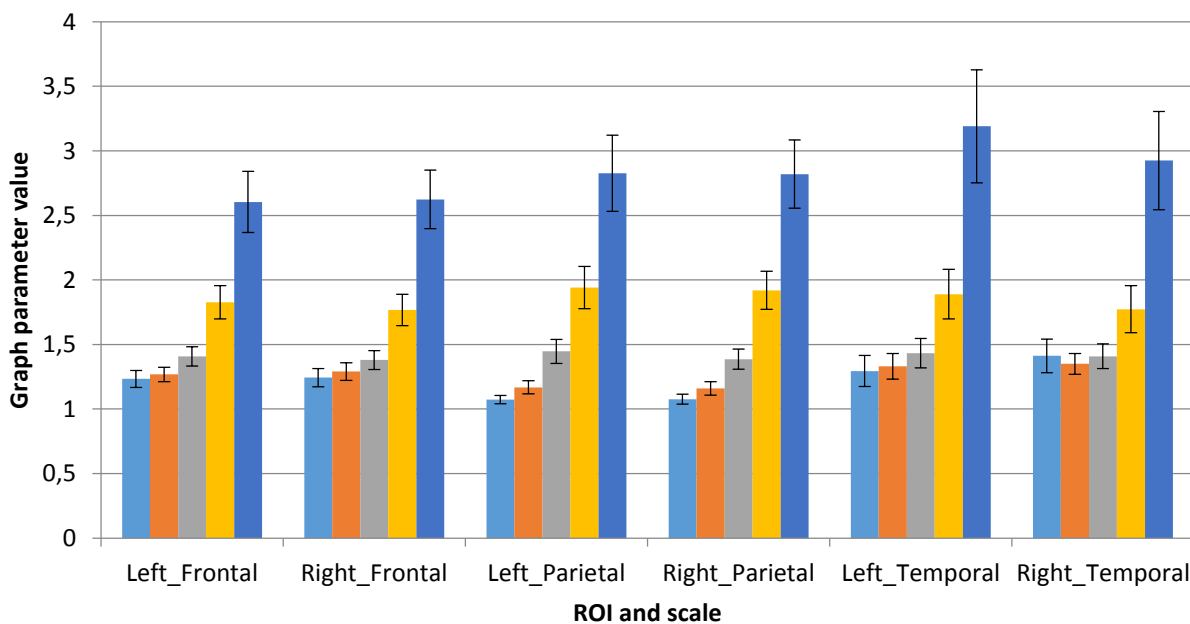

**Fig. S35: AdjLMaxDivD\_FAMean**

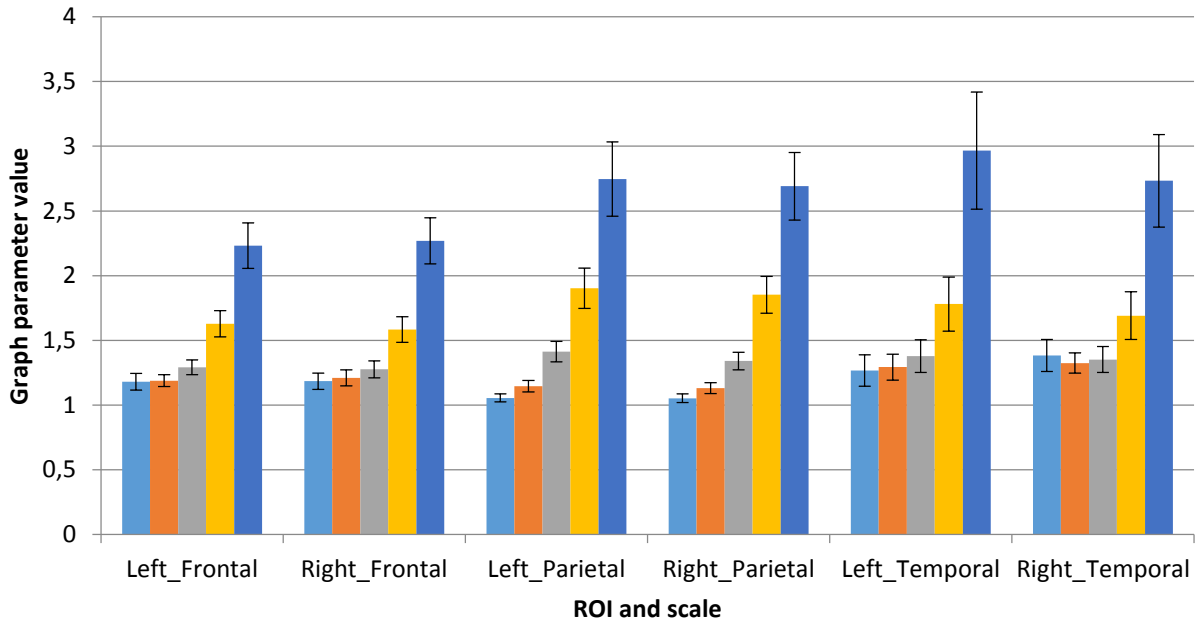

**Fig. S36: HoffmanBound\_Unweighted**

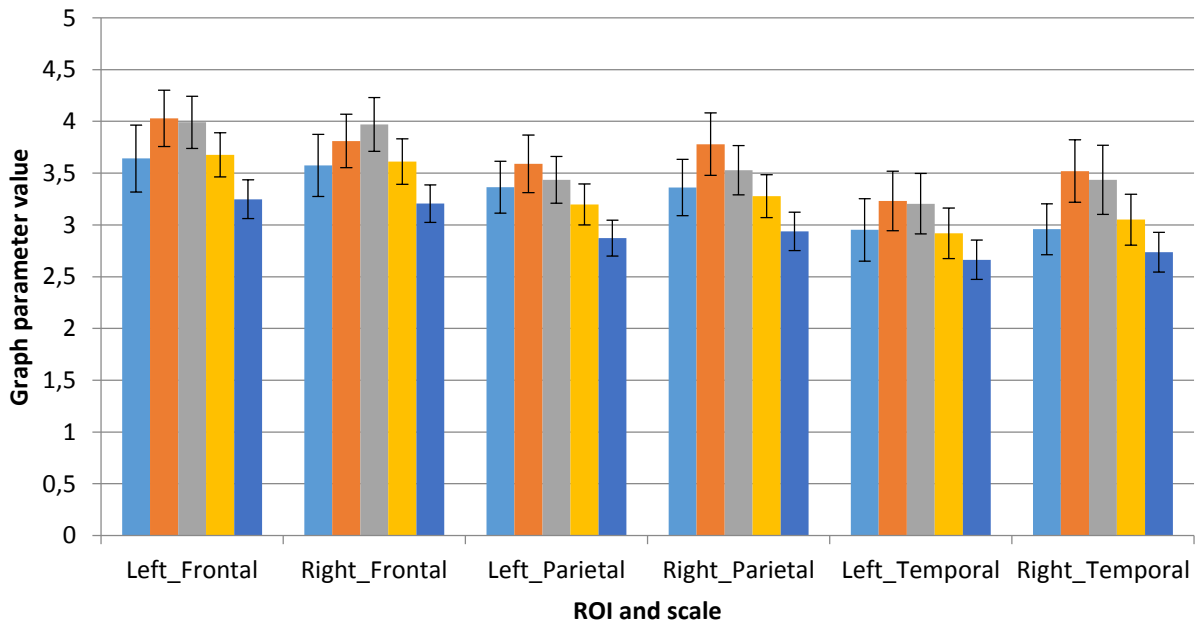

**Fig. S37: HoffmanBound\_FiberNDivLength**

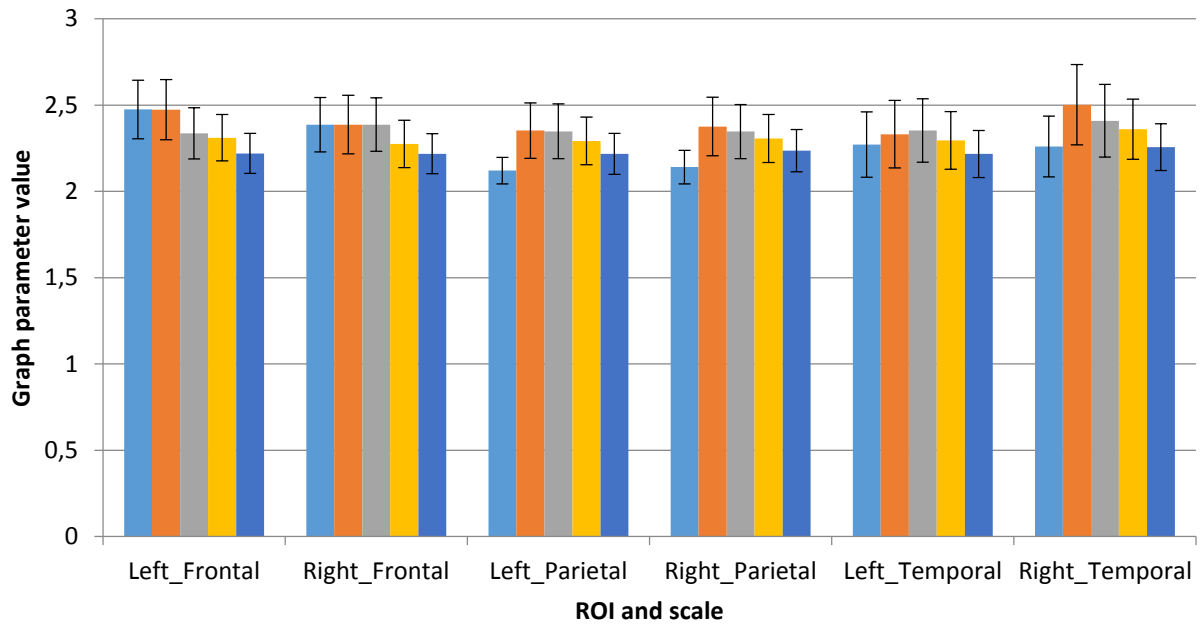

**Fig. S38: HoffmanBound\_FiberN**

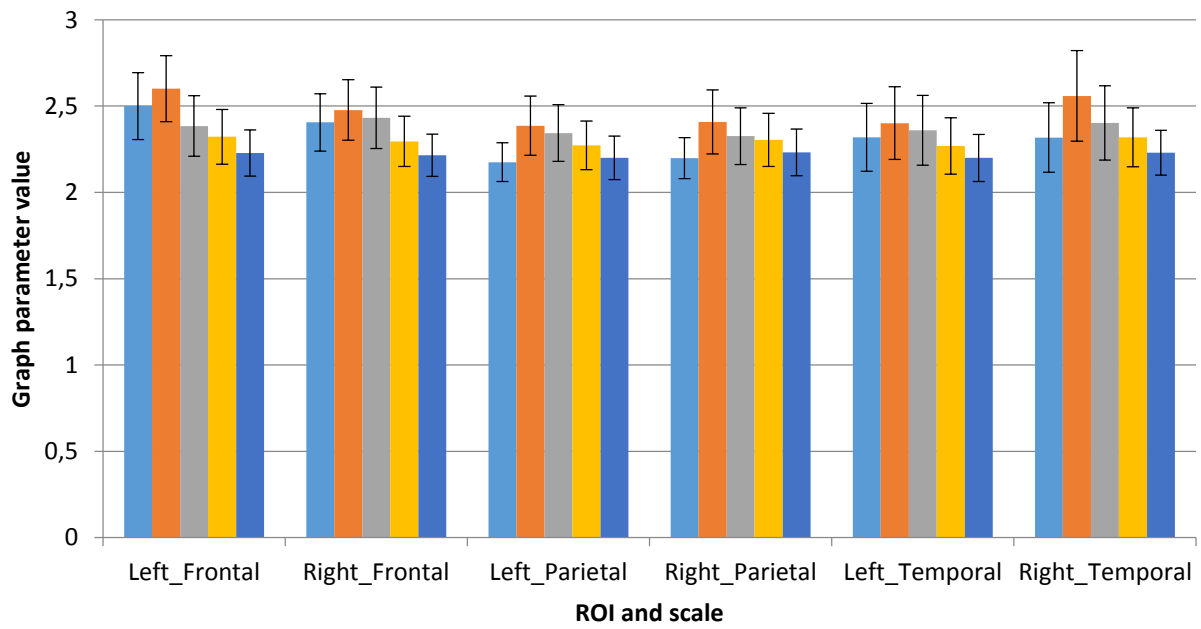

**Fig. S39: HoffmanBound\_FiberLengthMean**

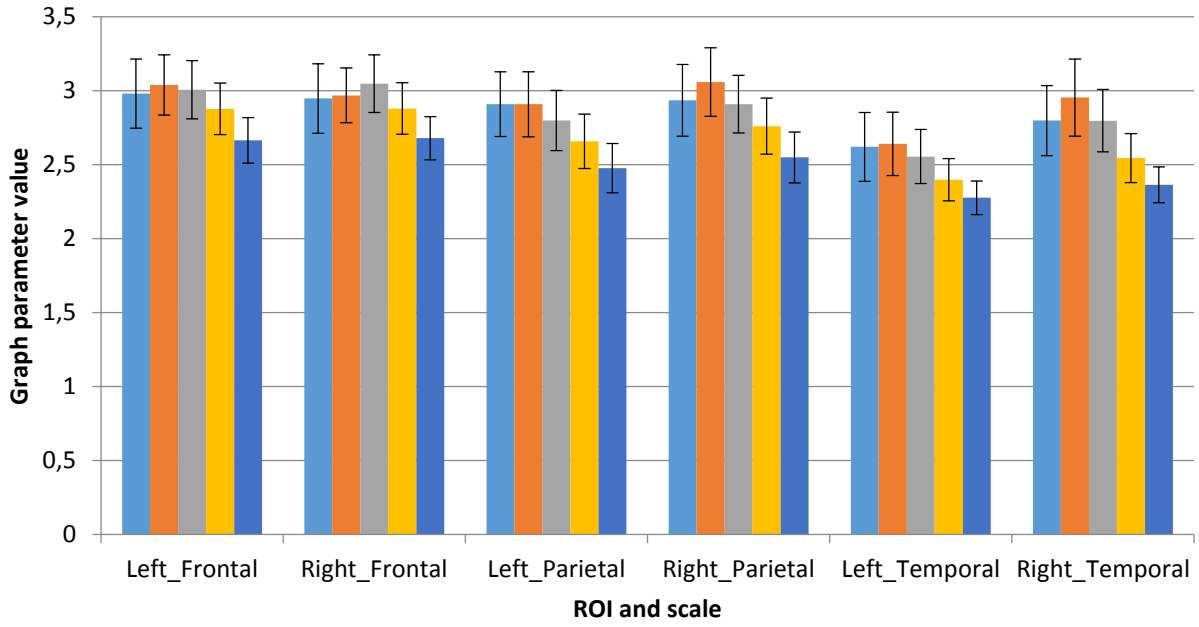

**Fig. S40: HoffmanBound\_FAMean**

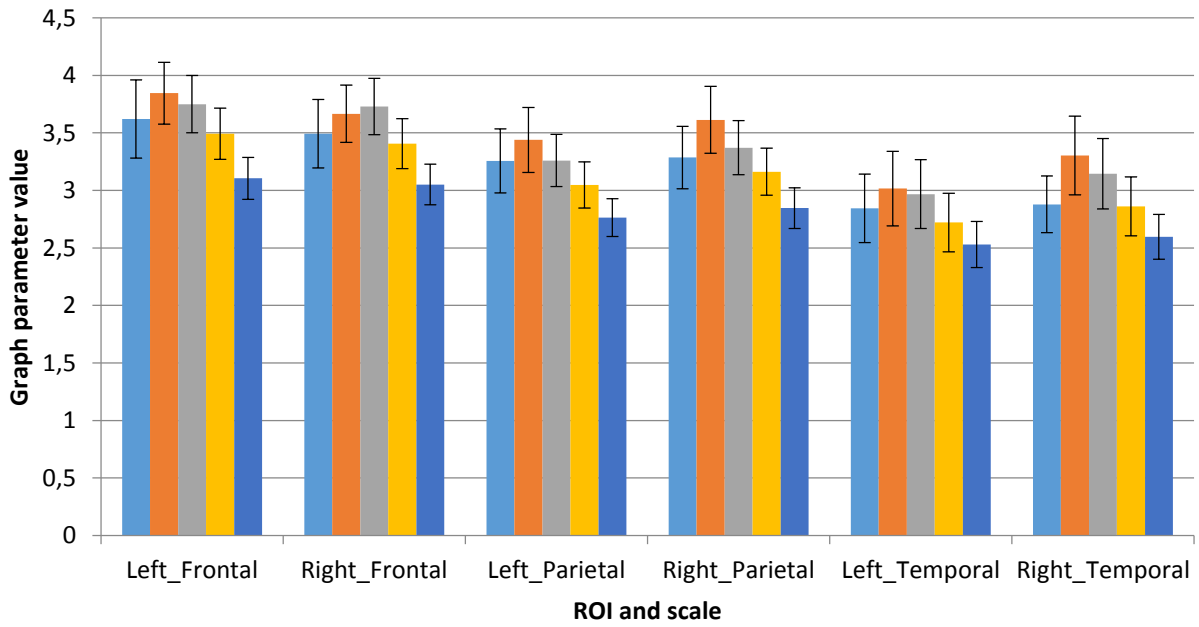

**Fig. S41: LogSpanningForestN\_Unweighted**

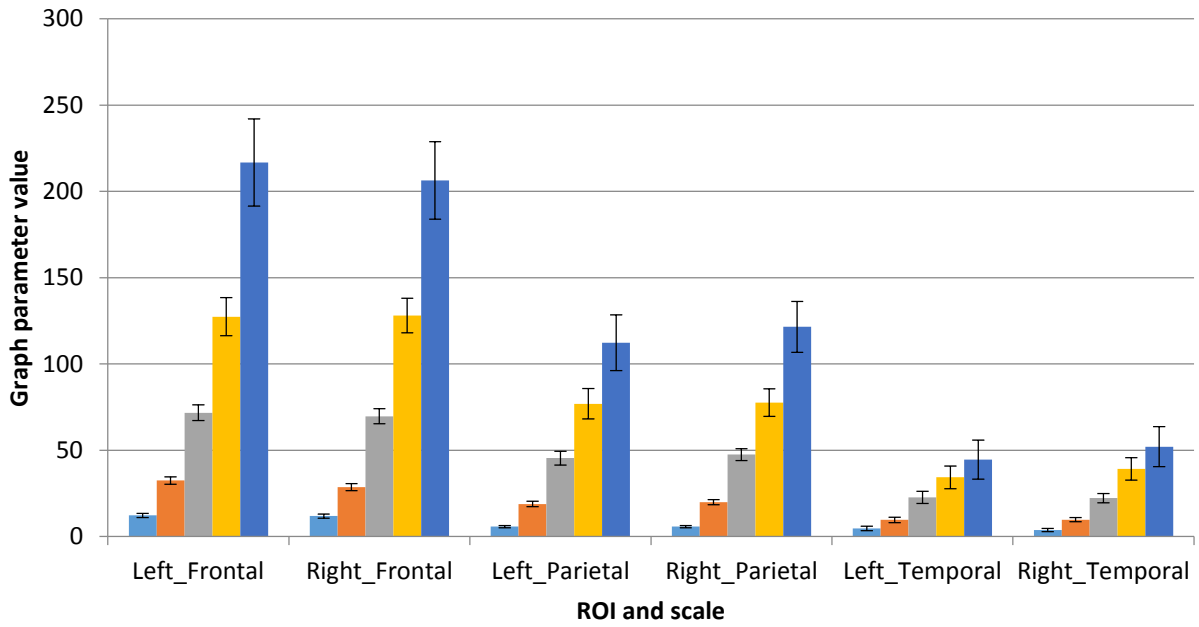

**Fig. S42: LogSpanningForestN\_FiberNDivLength**

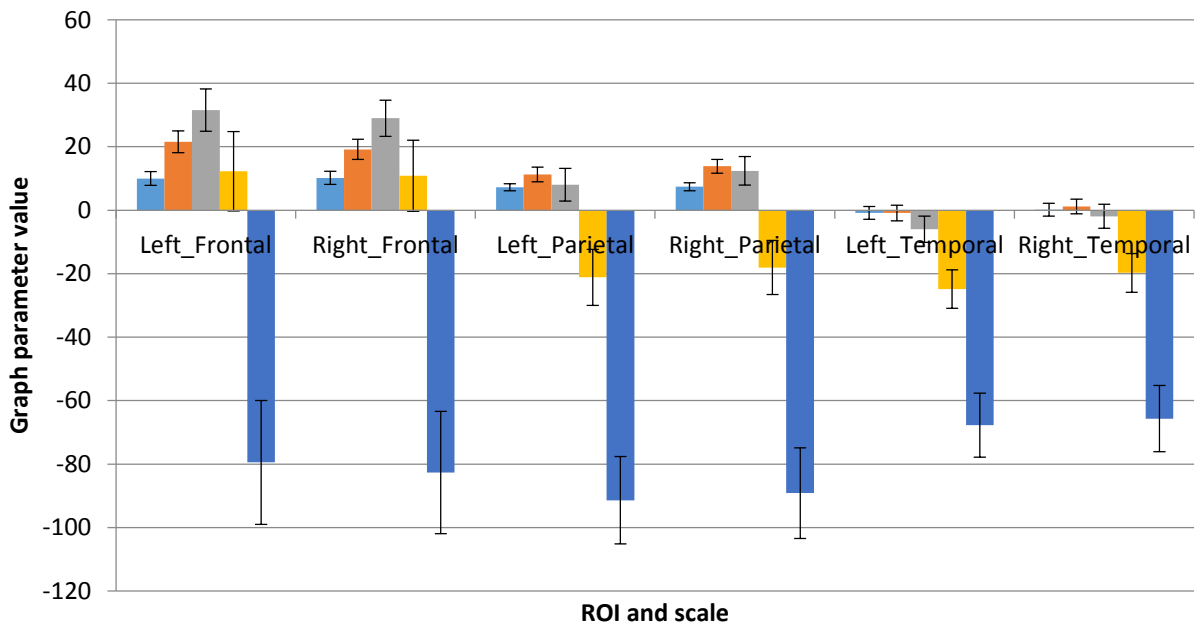

**Fig. S43: LogSpanningForestN\_FiberN**

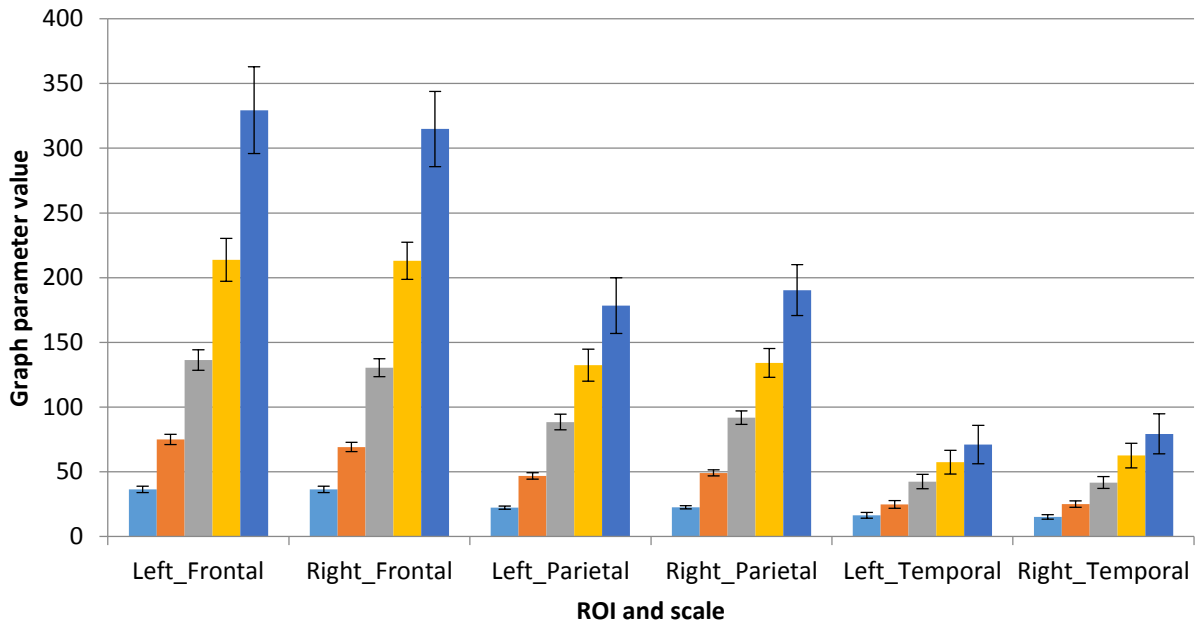

**Fig. S44: LogSpanningForestN\_FiberLengthMean**

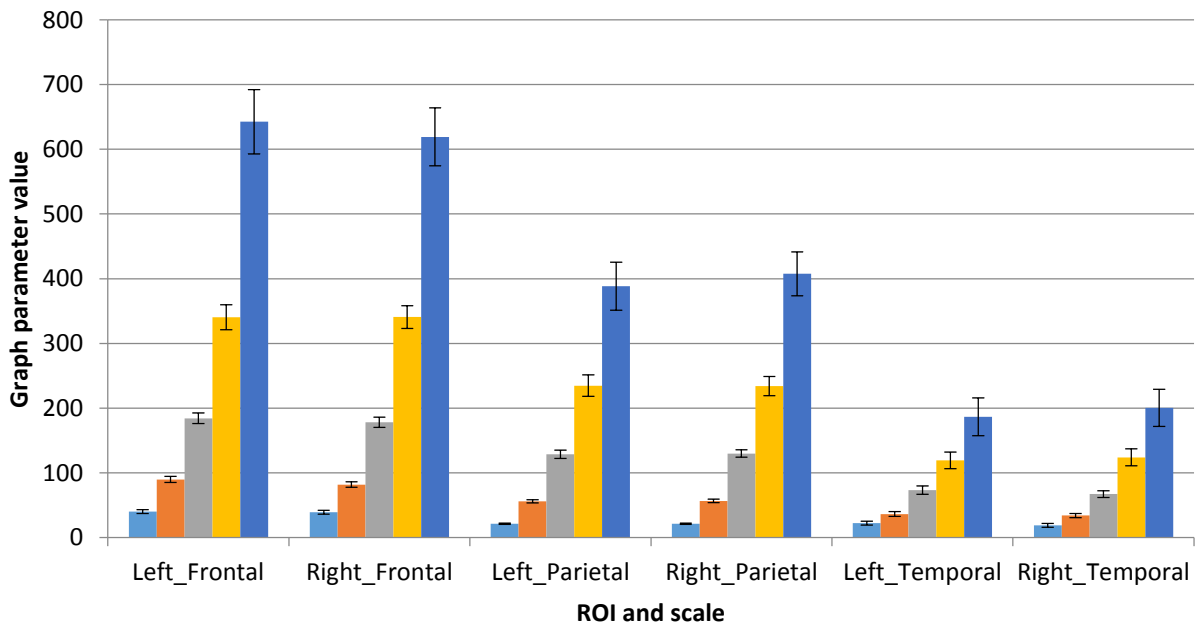

**Fig. S45: LogSpanningForestN\_FAMean**

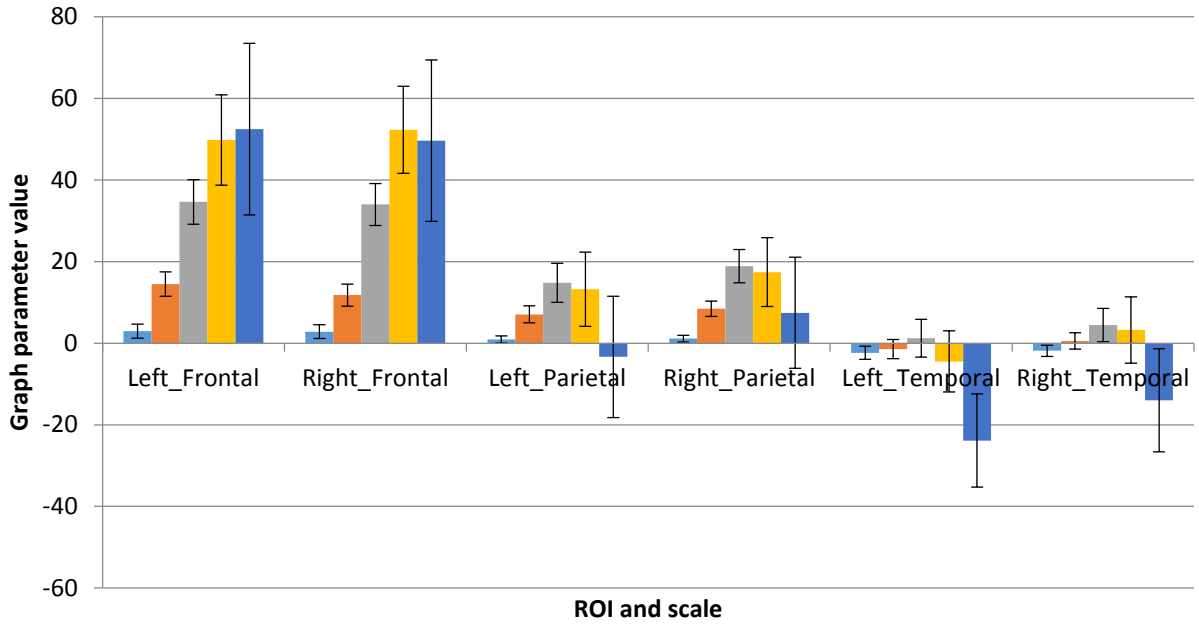

**Fig. S46: MinSpanningForest\_Unweighted**

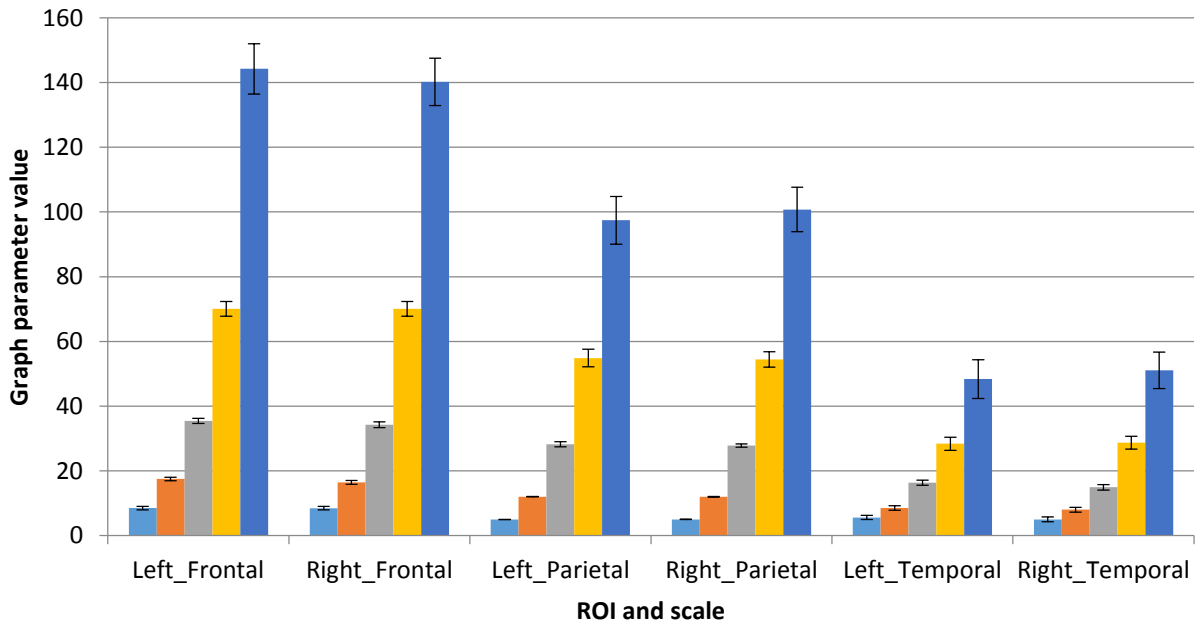

**Fig. S47: MinSpanningForest\_FiberNDivLength**

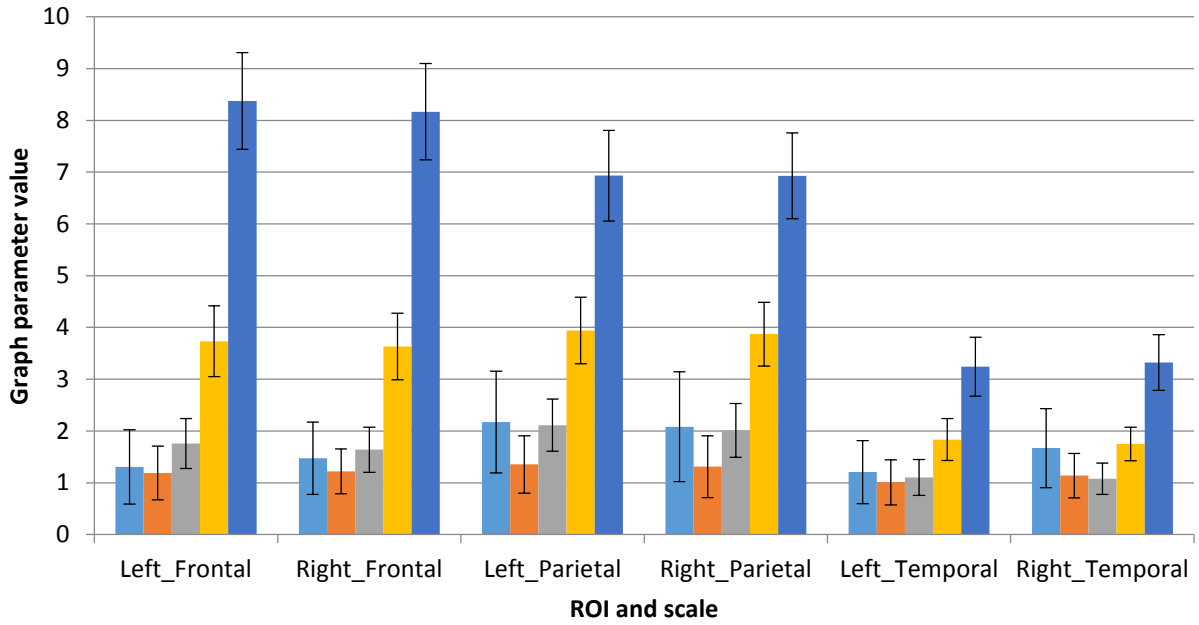

**Fig. S48: MinSpanningForest\_FiberN**

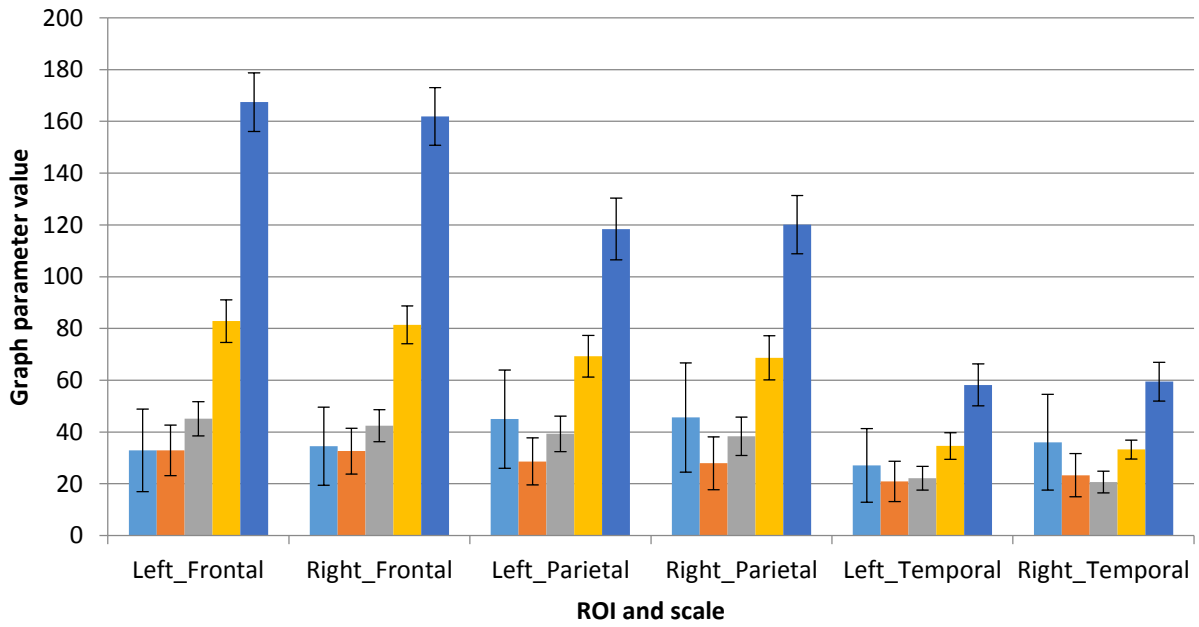



**Fig. S49: MinSpanningForest\_FiberLengthMean**

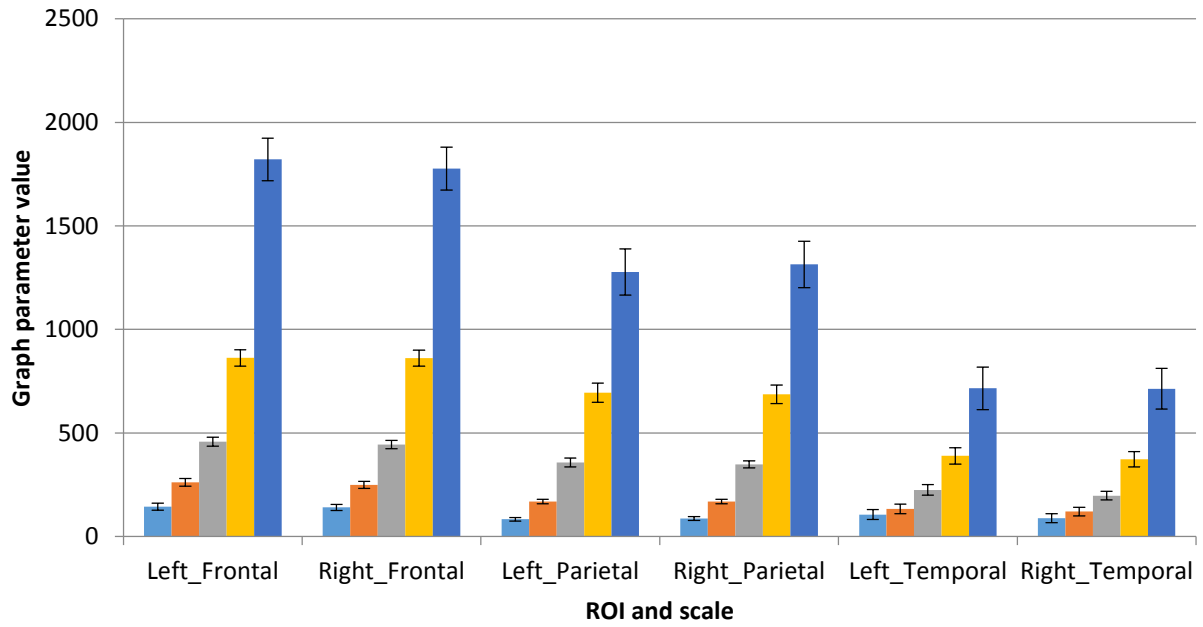

**Fig. S50: MinSpanningForest\_FAMean**

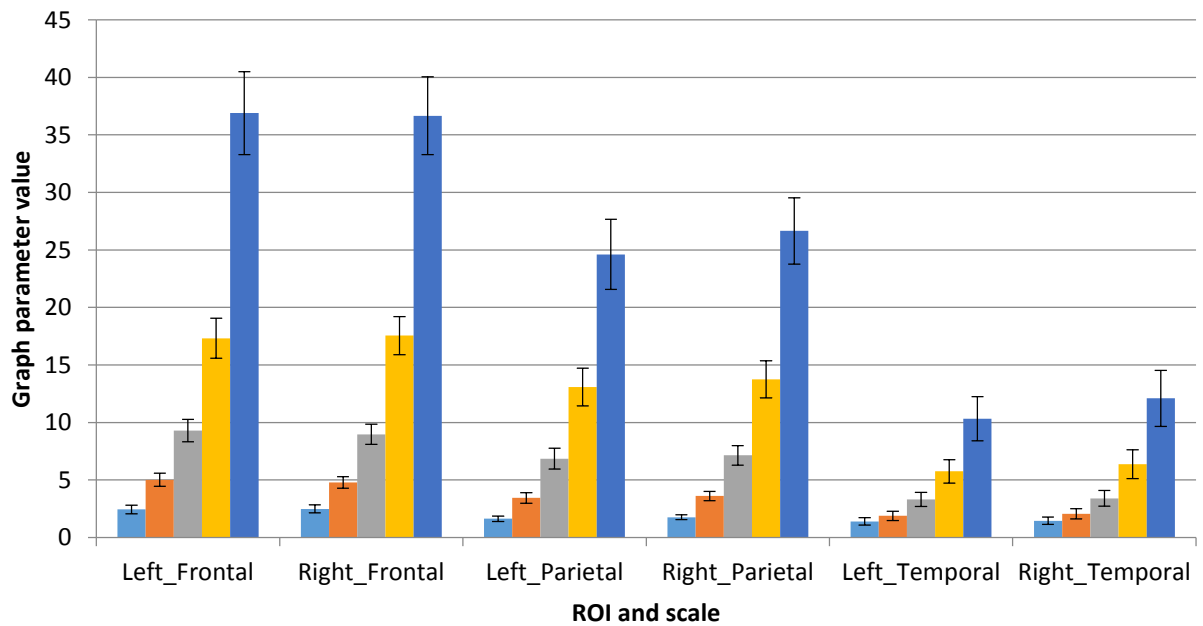

**Fig. S51:**  
**MinSpanningForestDivNMin1\_Unweighted**

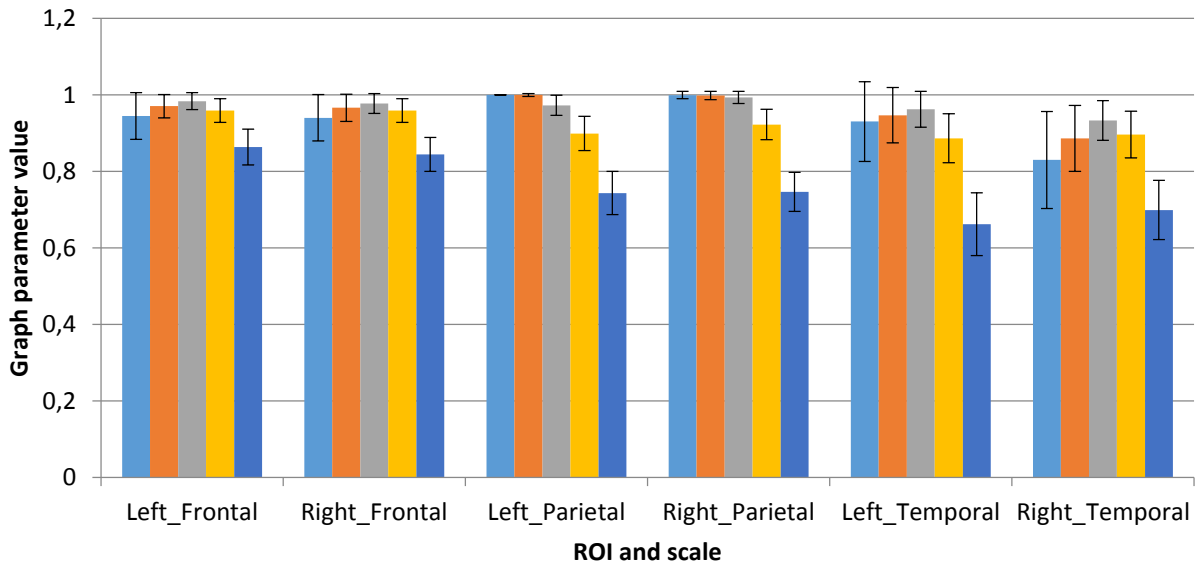

**Fig. S52:**  
**MinSpanningForestDivNMin1\_FiberNDivLength**

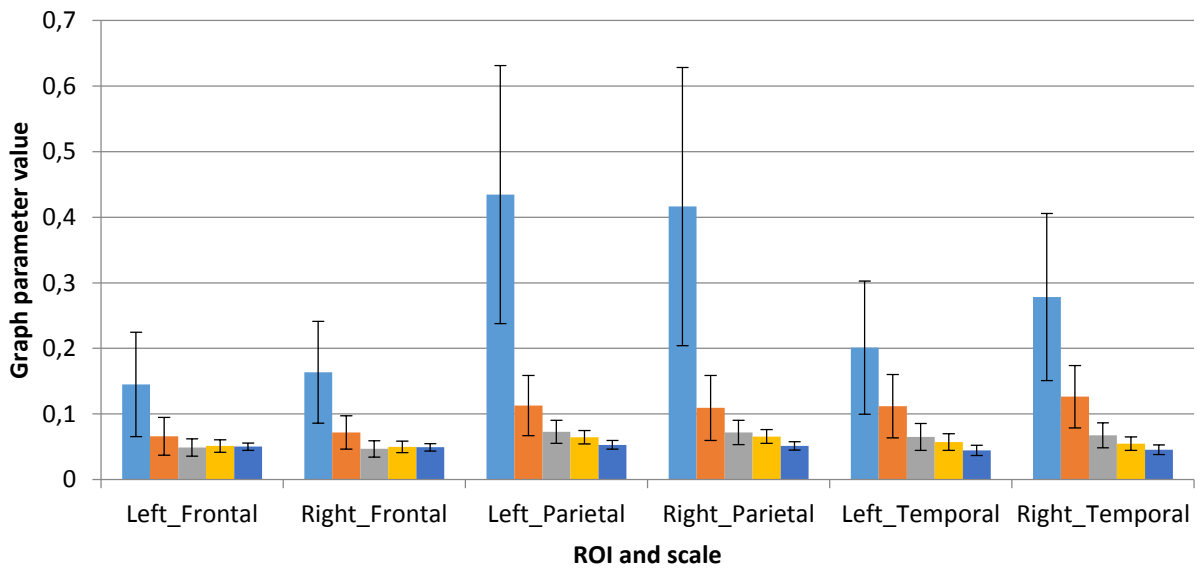

**Fig. S53: MinSpanningForestDivNMin1\_FiberN**

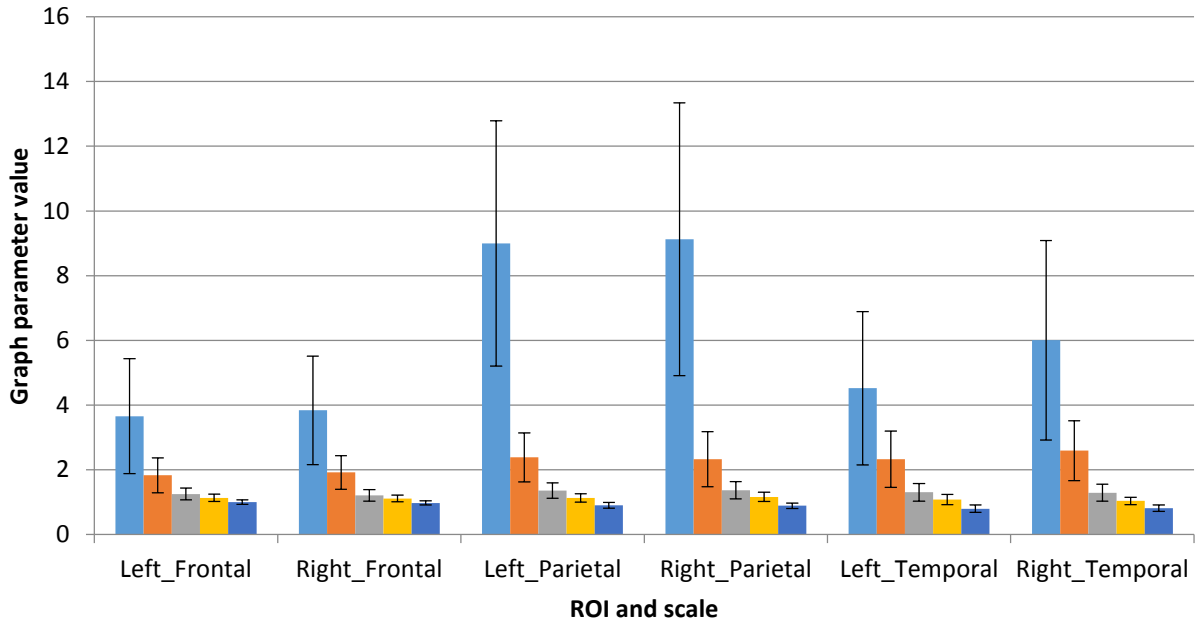

**Fig. S54:  
MinSpanningForestDivNMin1\_FiberLengthMean**

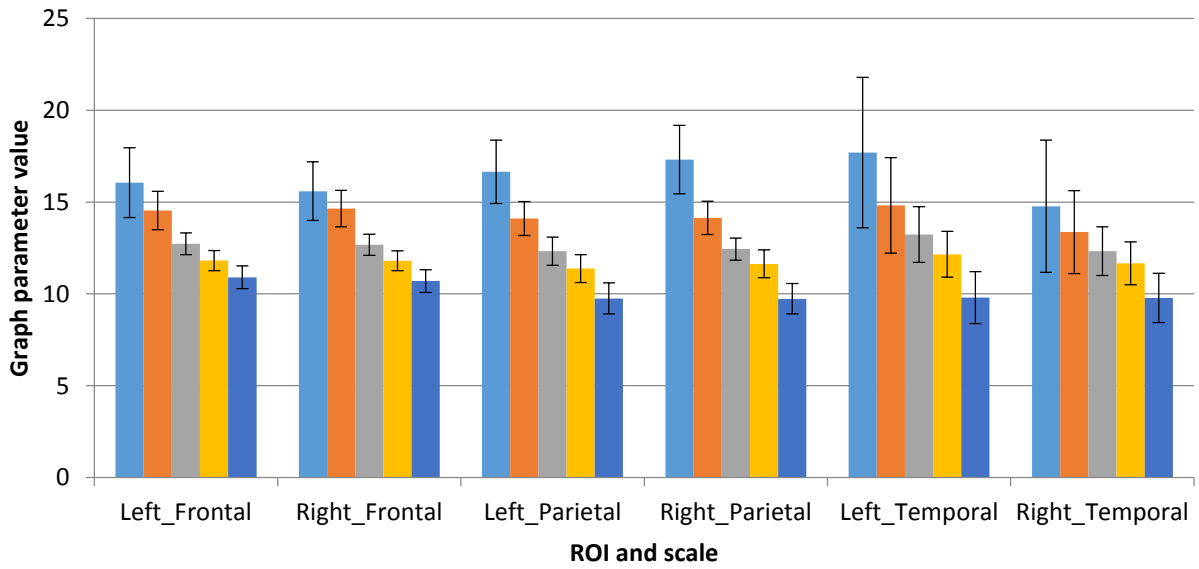

**Fig. S55: MinSpanningForestDivNMin1\_FAMean**

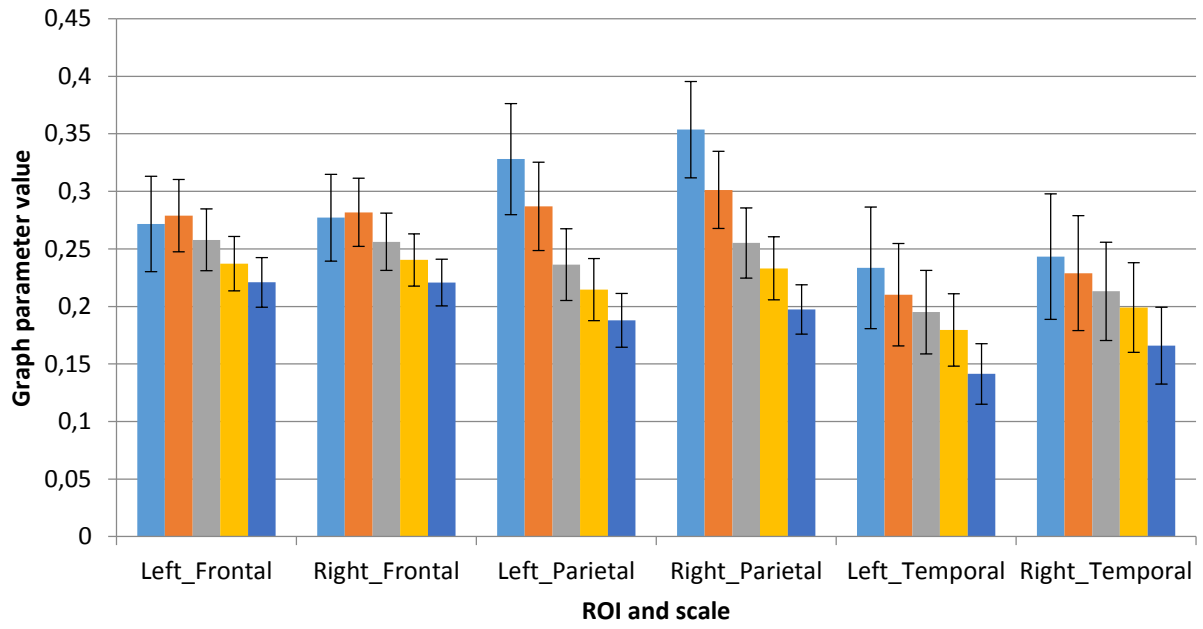

Supplement: 11571_2018_9508_MOESM1_ESM.pdf [file 11571_2018_9508_MOESM1_ESM.pdf]
